# Evaluation of gene-based family-based methods to detect novel genes associated with familial late onset Alzheimer disease.

Maria Victoria Fernández<sup>1,2</sup>, John Budde<sup>1,2</sup>, Jorge Del-Aguila<sup>1,2</sup>, Laura Ibañez<sup>1,2</sup>, Yuetiva Deming<sup>1,2</sup>, Oscar Harari<sup>1,2</sup>, Joanne Norton<sup>1,2</sup>, John C Morris<sup>2,3</sup>, Alison Goate<sup>4</sup>, NIA-LOAD family study group<sup>^</sup>, NCRAD<sup>^</sup>, Carlos Cruchaga<sup>1,2\*</sup>

<sup>1</sup> Department of Psychiatry, Washington University School of Medicine, 660 S. Euclid Ave. B8134, St. Louis, MO 63110, USA

<sup>2</sup> Hope Center for Neurological Disorders. Washington University School of Medicine, 660 S. Euclid Ave. B8111, St. Louis, MO 63110, USA

<sup>3</sup> Knight Alzheimer's Disease Research Center, Washington University School of Medicine, St. Louis, MO, USA

<sup>4</sup> Ronald M. Loeb Center for Alzheimer's disease, Dept of Neuroscience, Icahn School of Medicine at Mount Sinai, 1425 Madison Avenue, ICAHN 10-52, New York, NY 10029, USA

<sup>^</sup> Membership of the NIA-LOAD and NCRAD Family Study Group is provided in the Acknowledgements

## Correspondence:

Dr. Carlos Cruchaga

[cruchagac@wustl.edu](mailto:cruchagac@wustl.edu)

**Keywords:** gene-based, family-based, clustering, variance-component, transmission disequilibrium, rare variants, whole exome sequencing, Alzheimer's disease

28 **Abstract**

29 Gene-based tests to study the combined effect of rare variants towards a particular phenotype have been widely  
30 developed for case-control studies, but their evolution and adaptation for family-based studies, especially for  
31 complex incomplete families, has been slower. In this study, we have performed a practical examination of all  
32 the latest gene-based methods available for family-based study designs using both simulated and real datasets.  
33 We have examined the performance of several collapsing, variance-component and transmission disequilibrium  
34 tests across eight different software and twenty-two models utilizing a cohort of 285 families (N=1,235) with  
35 late-onset Alzheimer disease (LOAD). After a thorough examination of each of these tests, we propose a  
36 methodological approach to identify, with high confidence, genes associated with the studied phenotype with  
37 high confidence and we provide recommendations to select the best software and model for family-based gene-  
38 based analyses. Additionally, in our dataset, we identified *PTK2B*, a GWAS candidate gene for sporadic AD,  
39 along with six novel genes (*CHRD*, *CLCN2*, *HDLBP*, *CPAMD8*, *NLRP9*, *MASIL*) as candidates genes for  
40 familial LOAD.

41  
42 **Running title:** gene-based family-based methods in Alzheimer disease  
43  
44

## 1 Introduction

Alzheimer disease (AD) is a complex condition for which almost 50% of its phenotypic variability is due to genetic causes; yet, only 30% of the genetic variability is explained by known markers (Ridge et al. 2016). GWAS studies have identified more than 20 risk loci (Lambert et al. 2013); and sequencing studies have identified additional genes harboring low frequency variants with large effect size (*TREM2*, *PDL3*, *UNC5C*, *SORL1*, *ABCA7*, (Sims et al. 2017)). Recent studies also indicate that Late-Onset AD (LOAD) families are enriched for genetic risk factors (Cruchaga et al. 2017). Therefore studying those families may lead to the identification of novel variants and genes (Cruchaga et al. 2014; Guerreiro et al. 2013).

Current consensus is that the missing heritability for complex traits and AD may be hidden under the effect of rare variants with low to moderate effect on disease risk (Frazer et al. 2009; Manolio et al. 2009; Cirulli and Goldstein 2010). The rarity of these markers requires specific study designs and statistical analysis for their detection. The simplest approach to detect rare variants for association is to test each variant individually using standard contingency table and regression methods. But due to the few observations of the rare minor allele at a specific variant, the statistical power to detect association with any rare variant is limited; hence, extremely large samples are required and a more stringent multiple-test correction applies as compared to common variants (Bansal et al. 2010; B. Li and Leal 2008). It has been acknowledged that the best alternative is to collapse sets of pre-defined candidate rare variants within significant units, usually genes (gene-based sets) (Lee et al. 2014; Neale and Sham 2004). Collapsing tests work under the framework of giving each variant a certain weight and perform summation of weights through all variants within the region; depending on the weights and how summation is performed there are four major types of gene-based methods: collapsing tests, variance-component tests, and combined tests (Lee et al. 2014). Collapsing tests, analyze whether the overall burden of rare variants is significantly different in cases compared to controls by regressing disease status on minor allele counts (MAC). The Cohort Allelic Sum Test (CAST) is a dominant genetic model that assumes that the presence of any rare variant increases disease risk (Morgenthaler and Thilly 2007); whereas the Combined Multivariate and Collapsing (CMC) method, collapses rare variants in different MAF categories and evaluates the joint effect of common and rare variants through Hotelling's test (Li and Leal 2008). However, neither CAST nor CMC tests allow correcting for directional effect. The Variable Threshold (VT) test instead allows for both trait-increasing and trait-decreasing variants; it selects optimal frequency thresholds for burden tests of rare variants and estimates p-values analytically or by permutation (Price et al. 2010). Variance-component methods test for association by evaluating the distribution of genetic effects for a group of variants while appropriately weighting the contribution of each variant. The sequence kernel association test (SKAT) casts the problem in mixed models (Lee et al. 2014), and in the absence of covariates, SKAT reduces to C-alpha test. (Neale et al. 2011). Finally, collapsing and variance component tests can be combined into one statistical method, the SKAT-O approach (Lee et al. 2012), which is statistically efficient regardless of the direction and effect of the variants studied.

All these methods were initially designed for unrelated case-control study designs; but given the rarity of these variants, large datasets are required to achieve statistical power. (Laird and Lange 2006). Alternatively, family-based studies in which several family members share the same phenotype may provide more statistical power than regular case-controls studies (Li et al. 2006; Cirulli and Goldstein 2010; Ott et al. 2011; Kazma and Bailey 2011). Pioneering methods were designed for testing nuclear families, trios or sibships (Ionita-Laza et al. 2013; Horvath et al. 2001; Laird et al. 2000; De et al. 2013; Ott et al. 2011). However, considering the late-onset nature of Alzheimer disease it is often difficult to obtain genetic information from parents (to conform trios), or nuclear family units. The usual pedigree in familial LOAD corresponds to incomplete, large familial units (**Figure 1**). Most of the initial software for gene-based family-based studies were not suitable for complex pedigrees like those observed in Alzheimer studies, but in recent years a plethora of methods have been developed that take into account complex family structure in gene-based calculations. Among the software that take into account large pedigrees we find SKAT (Wu et al. 2011), FSKAT (Yan et al. 2015), GSKAT (Wang et

al. 2013), RV-GDT (Chen et al. 2009), EPACTS (<http://genome.sph.umich.edu/wiki/EPACTS>), FarVAT (Choi et al. 2014), PedGene (Schaid et al. 2013) and RareIBD (Sul et al. 2016).

In this study, we wanted to evaluate the performance of the eight most common gene-based family-based methods available using a real dataset, over 250 multiplex families affected with Alzheimer disease, under different conditions and models. We simulated multiple scenarios in which a candidate variant perfectly segregates with disease status to rank the different programs and models. We also tested the performance of these tests at evaluating known causal genes for AD in our cohort. Finally, we performed genome-wide analysis to evaluate the power of each of these tests. Altogether, we discuss the pros and cons of each method that can be very informative for other investigators performing similar analyses: complex diseases in complex, incomplete, large families. We want to emphasize that although this work is centered on AD, the information extracted from this work can be equally applied to other complex traits. Finally, based on the results from the methods analyzed, we present some candidate genes for AD.

## 2 Materials and Methods

### 2.1 Cohort

The LOAD families included in this study originated from two cohorts: Washington University School of Medicine (WUSM) cohort and ADSP cohort.

#### 2.1.1 WUSM cohort

Samples from the Washington University School of Medicine (WUSM) cohort were recruited by either the Charles F. and Joanne Knight Alzheimer's Disease Research Center (Knight ADRC) at the WUSM in Saint Louis or the National Institute on Aging Genetics Initiative for Late-Onset Alzheimer's Disease (NIA-LOAD). This study was approved by each recruiting center Institutional Review Board. Research was carried out in accordance with the approved protocol. Written informed consent was obtained from participants and their family members by the Clinical and Genetics Core of the Knight ADRC. The approval number for the Knight ADRC Genetics Core family studies is 201104178. The NIA-LOAD Family Study has recruited multiplex families with two or more siblings affected with LOAD across the United States. A description of these samples has been reported previously (Wijsman et al. 2011) (Fernández et al. 2017; Cruchaga et al. 2012). We selected individuals for sequencing from families in which APOE $\epsilon$ 4 did not segregate with disease status, and in which the proband of the family did not carry any known mutation in *APP*, *PSEN1*, *PSEN2*, *MAPT*, *GRN* or *C9orf72* (described previously (Cruchaga et al. 2012)).

#### 2.1.2 ADSP cohort

The Alzheimer's Disease Sequencing Project (ADSP) is a collaborative work of five independent groups across the USA that aims to identify new genomic variants contributing to increased risk for LOAD. (<https://www.niagads.org/adsp/content/home>). During the discovery phase, they generated whole genome sequence (WGS) data from members of multiplex LOAD families, and whole exome sequence (WES) data from a large case-control cohort. These data are available to qualified researchers through the database of Genotypes and Phenotypes (<https://www.ncbi.nlm.nih.gov/gap> Study Accession: phs000572.v7.p4).

The familial cohort of the ADSP consists of 582 individuals from 111 multiplex AD families from European-American, Caribbean Hispanic, and Dutch ancestry (details about the samples are available at NIAGADS). We downloaded raw data (.sra format) from dbGAP for 143 IDs (113 cases and 23 controls) from 37 multiplex families of European-American ancestry that were incorporated with the WUSM cohort.

38

## 39 2.2 Sequencing

40 Samples were sequenced using either whole-genome sequencing (WGS, 12%) or whole-exome sequencing  
41 (WES, 88%). Exome libraries were prepared using Agilent's SureSelect Human All Exon kits V3 and V5 or  
42 Roche VCRome (Table 2). Both, WES and WGS samples were sequenced on a HiSeq2000 with paired ends  
43 reads, with a mean depth of coverage of 50× to 150× for WES and 30× for WGS. Alignment was conducted  
44 against GRCh37.p13 genome reference. Variant calling was performed separately for WES and WGS following  
45 GATK's 3.6 Best Practices (<https://software.broadinstitute.org/gatk/best-practices/>) and restricted to Agilent's  
46 V5 kit plus a 100bp of padding added to each capture target end. We used BCFTOOLS  
47 (<https://samtools.github.io/bcftools/bcftools.html>) to decompose multiallelic variants into biallelic prior variant  
48 quality control. Variant Quality Score Recalibration (VQSR) was performed separately for WES and WGS, and  
49 for SNPs and INDELS. Only those SNPs and indels that fell within the above 99.9 confidence threshold, as  
50 indicated by WQSR, were considered for analysis; variants within low complexity regions were removed from  
51 both WES and WGS and variants with a depth (DP) larger than the average DP + 5 SD in the WGS dataset were  
52 removed. At this point SNPs and indels from WES and WGS datasets were merged into one file. Non-  
53 polymorphic variants and those outside the expected ratio of allele balance for heterozygosity calls  
54 ( $AB_{Het}=0.3-0.7$ ) were removed. Additional hard filters implemented included quality depth ( $QD \geq 7$  for indels  
55 and  $QD \geq 2$  for SNPs), mapping quality ( $MQ \geq 40$ ), fisher strand balance ( $FS \geq 200$  for indels and  $FS \geq 60$  for  
56 SNPs), Strand Odds Ratio ( $SOR \geq 10$  for Indels and  $SOR \geq 3$  for SNPs), Inbreeding Coefficient ( $IC \geq -0.8$  for  
57 indels) and Rank Sum Test for relative positioning of reference versus alternative alleles within reads ( $RPRS \geq$   
58  $20$  for Indels and  $RPRS \geq -8$  for SNPs) (**Figure S1**). We used PLINK1.9 ([https://www.cog-  
genomics.org/plink2/ibd](https://www.cog-<br/>genomics.org/plink2/ibd)) to remove variants out of Hardy Weinberg equilibrium ( $p$ -value  $< 1 \times 10^{-6}$ ), with a  
59 genotype calling rate below 95%, with differential missingness between cases vs controls, WES vs WGS, or  
60 among different sequencing platforms ( $p$ -value  $< 1 \times 10^{-6}$ ).

61 Samples with more than 10% of missing variants (four samples) and whose genotype data indicated a sex  
62 discordant from the clinical database (three samples) were removed from dataset. Individual and familial  
63 relatedness was confirmed using identity-by-descent (IBD) calculations, an existing GWAS dataset for these  
64 individuals, and the pedigree information. Because many of the ADSP families were also recruited from the  
65 NIA-LOAD repository there is a certain overlap (48 individuals) between the WUSM and the ADSP familial  
66 cohorts; we kept the duplicated pair that had better genotyping rate after QC. Principal Component Analysis  
67 (PCA) was calculated to corroborate ancestry and restrict our analysis to only samples from European American  
68 origin. Functional impact and population frequencies of variants were annotated with SnpEff (Cingolani et al.  
69 2012). For this analysis, only SNVs with a minor allele frequency (MAF) below 1%, as registered in ExAC  
70 (Lek et al. 2016), were taken into account.

71 We excluded families carrying a known pathogenic mutation in any of the Mendelian genes for Alzheimer  
72 disease, Frontotemporal Dementia, or Parkinson disease (Fernández et al. 2017). We restricted the selection of  
73 families to those families with at least one case and one control in the family, and we excluded any participants  
74 initially diagnosed as AD but that turned into other after pathological examination. Finally, our dataset  
75 consisted of 1235 non-hispanic whites (NHW), 824 cases and 411 controls, from 285 different families (Table  
76 1, Table S1).

## 31 2.3 Study design & analysis.

32 The goal of this study was to test the performance and power of different gene-based family-based methods  
33 available to date, using a real dataset consisting of 1,235 non-hispanic white individuals from 285 families  
34 densely affected with AD. We set up three different scenarios to test (**Figure 2**). First, using the real phenotype  
35 and pedigree structure of 25 from the 285 families, we generated a synthetic dataset with multiple variants and



families with perfect segregation. Second, we evaluated different variant-combinations for the *APOE* gene. Third, we performed genome-wide gene-based analysis accounting only for non-synonymous SNPs with a  $MAF < 1\%$ . For each one of these scenarios we evaluated the performance of the different gene-based methods (collapsing, variance-component, and transmission disequilibrium) from the following family-based packages: SKAT (Wu et al. 2011), FSKAT (Yan et al. 2015), GSKAT (Wang et al. 2013), RVGDT (He et al. 2017), EPACTS (<http://genome.sph.umich.edu/wiki/EPACTS>), FarVAT (Choi et al. 2014), PedGene (Schaid et al. 2013), RareIBD (Sul et al. 2016). Some of these software offer the option to run different gene-based algorithms; e.g. GSKAT, EPACTS, FarVAT or PedGene can run collapsing and variance-component tests; therefore, we ran a total of 25 models (Table 3). The details of each one of these scenarios are described next.

### 2.3.1 Simulated data

We selected 25 representative families from our entire dataset for which there was genotypic data for three to seven members (Table S2). We used the existing family structure and phenotype of these families, and a simulated gene called “GENE-A” containing five variants. We generated several scenarios in which different numbers of families presented perfect segregation with disease status for a variant in GENE-A (Table 4 and Table S2). First, we considered a scenario in which only the first five families of the dataset were included in the analyses, and each family presented a different perfectly segregating variant of GENE-A (scenario 5 family carriers (FC) and 0 non-carriers (FNC): 5FC×0FNC). Second, we generated additional scenarios in which we kept the same five families carrier of segregating variants in GENE-A, and added five (scenario 5FC×5FNC), ten (scenario 5FC×10FNC), 15 (scenario 5FC×15FNC), and 20 (scenario 5FC×20FNC) families that were not carriers of any variant in GENE-A. Then, we considered four scenarios of 25 families in which each new scenario added families who were carriers of a segregating variant in GENE-A. We started with the scenario 5FC×20FNC, then we simulated ten families carriers and 15 families non-carriers (scenario 10FC×15FNC), 15 families carriers and 10 families non-carriers (scenario 15FC×10FNC), 20 families carriers and five families non-carriers (scenario 20FC×5FNC) and concluded with a scenario in which all 25 families were carriers of one, of the possible five, segregating variant in GENE-A (scenario 25FC×0FNC). We tested each one of these scenarios with all previously mentioned gene-based methods and software to evaluate their power to associate perfect segregating variants with disease.

### 2.3.2 Candidate genes

*APOE* is the largest genetic risk factor for Alzheimer’s disease. The allelic combination of two SNPs, rs429358 (*APOE* 4; 19:45411941:T:C) and rs7412 (*APOE* 2; 19:45412079:C:T), determines one of the three major isoforms of *APOE* protein,  $\epsilon_2$ ,  $\epsilon_3$  or  $\epsilon_4$ . The dosage of these isoforms determines a person’s risk to suffer AD, from having a protective effect *APOE*  $\epsilon_2/\epsilon_2$  (OR 0.6) or  $\epsilon_2/\epsilon_3$  (OR 0.6) to different degrees of increased risk according to the number of copies of the  $\epsilon_4$  allele ( $\epsilon_2/\epsilon_4$ , OR 2.6;  $\epsilon_3/\epsilon_4$ , OR 3.2;  $\epsilon_4/\epsilon_4$ , OR 14.9) (Farrer et al. 1997). We tested the power of all previously mentioned gene-based methods and software to detect association of *APOE* gene with disease in our entire dataset (N=1,235) under different conditions. We first tested all polymorphic variants (nonsynonymous with  $MAF < 1\%$ ) in the *APOE* gene, second we tested only those variants considered to have a high or moderate effect on the protein including rs429358 and rs7412, and then we tested high and moderate variants alone, and finally tested rs429358 and rs7412 alone.

### 2.3.3 Genome-wide analyses

We performed gene-based burden analysis on a genome-wide level in our entire dataset (families n=285; samples N=1,235) to evaluate the power of each of the previously mentioned methods to detect novel genes significantly associated with disease; only single nucleotide variants (SNVs) with a minor allele frequency equal or below 1%, based on the EXAC dataset (Lek et al. 2016) ( $MAF \leq 1\%$ ), and with a predicted high or moderate effect, according to SnpEff (Cingolani et al. 2012) were included in the analysis. Quantile-Quantile (QQ) plots from gene-based p-values were generated with the R package “ggplot2” (Wickham 2009). We also evaluated the correlation between these methods using Pearson correlation (Pc) and Spearman correlation (Sc)

tests on the log of the p-value using R v3.4.0 (R Core Team 2017). Pc evaluates the linear relationship between two continuous variables whereas Sc evaluates the monotonic relationship between two continuous or ordinal variables.

## 2.4 Software tested

A accompanying supporting file (**Supplementary material**) provides a summary of the code employed to run each of the programs described below.

### 2.4.1 GSKAT

GSKAT (Wang et al. 2013) is among the first R packages to come out with the goal of extending burden and kernel-based gene set association tests for population data to related samples with binary phenotypes. To handle the correlated or clustered structure in the family data, GSKAT fits a marginal model with generalized estimated equations (GEE). The basic idea of GEE is to replace the covariance matrix in a generalized linear mix model (GLMM) with a working covariance matrix that reflects the cluster dependencies. Accordingly, GSKAT blends the strengths of kernel machine methods and generalized estimating equations (GEE), to test for the association between a phenotype and multiple variants in a SNP set. We ran GSKAT correcting for sex and first two PCs.

### 2.4.2 SKAT

The sequence kernel association test SKAT (Wu et al. 2011) is an R package initially designed for case-control analysis. Later they incorporated the Efficient Mixed-Model Association eXpedited (EMMAX) algorithm (Zhou and Stephens 2012; Kang et al. 2010) that allows for performing family-based analysis. EMMAX simultaneously corrects for both population stratification and relatedness in an association study by using a linear mixed model with an empirically estimated relatedness matrix to model the correlation between phenotypes of sample subjects. The efficient application of EMMAX algorithm depends on appropriate estimate of the variance parameters. Relatedness matrices can be calculated based on pedigree structure or estimated from genotype data. For the latter, different methods have been proposed. Relatedness can be estimated using those alleles that have descended from a single ancestral allele, i.e. those that are Identical by Descent (IBD), or using the Balding-Nichols (BN) method (Balding and Nichols 1995) which explicitly models current day populations via their divergence from an ancestral population specified by Wright's  $F_{st}$  statistic. We ran SKAT v1.2.1, on R v3.3.3, using option SKAT\_Null\_EMMAX correcting for sex and first two PCs and we tested four different kinship matrices: pedigree, IBS, BN and a BN based kinship matrix (HR) that EPACTS software constructs (**Table S3**).

### 2.4.3 FSKAT

FSKAT (Yan et al. 2015), also an R package, is based on a kernel machine regression and can be viewed as an extension of the sequence kernel association test (SKAT and famSKAT) for application to family data with dichotomous traits. FSKAT is based on a GLMM framework. Moreover, because it uses all family samples, FSKAT claims to be more powerful than SKAT that uses only unrelated individuals (founders) in the family data. FSKAT constructs a kinship matrix based on pedigree relationships using the R kinship library. We ran FSKAT correcting for sex and first two PCs.

### 2.4.4 EPACTS

Efficient and Parallelizable Association Container Toolbox (EPACTS) is a stand-alone software that implements several gene-based statistical tests (CMC, VT and SKAT) and adapts them to complex families by using EMMAX (<https://genome.sph.umich.edu/wiki/EPACTS>). EPACTS generates a kinship matrix based on BN algorithm and also annotates the genotypic input file and offers filtering tools (frequency and predicted

effect of variants) for easier user-selection of variants that go into gene-based analysis. Nonetheless, we used the same set of variants as in other tests, and corrected for sex and first two PCs, to run our analysis with EFACTS.

#### 2.4.5 FarVAT

The Family-based Rare Variant Association Test (FarVAT) (Choi et al. 2014) provides a burden and a variance component test (VT) for extended families, and extends these approaches to the SKAT-O statistic. FarVAT assumes that families are ascertained based on the disease status of family members, and minor allele frequencies between affected and unaffected individuals are compared. FarVAT is implemented in C++ and is computationally efficient. Additionally, if genotype frequencies of affected and unaffected samples are compared to detect the genetic association, it has been shown that the statistical efficiency can be improved by modifying the phenotype; and so FarVAT uses prevalence (Lange and Laird 2002) or Best Linear Unbalanced Predictor (BLUP) (Thornton and McPeck 2007) as covariate to modify the genotype.

#### 2.4.6 PedGene

PedGene (Schaid et al. 2013) is an R package that extends burden and kernel statistics to analyze binary traits in family data, using large-scale genomic data to calculate pedigree relationships. To derive the kernel association statistic and the burden statistic for data that includes related subjects, they take a retrospective view of sampling, with the genotypes considered random.

#### 2.4.7 RVGDT

The Rare Variant Generalized Disequilibrium Test (RVGDT) (He et al. 2017), implemented in Python, differs from the previous methods presented. Instead of using a kernel method to evaluate variants, derives from the generalized disequilibrium test (GDT) which uses genotype differences in all discordant relative pairs to assess associations within a family (Chen et al. Rich 2009). The rare-variant extension of GDT (RVGDT) aggregates a single-variant GDT statistic over a genomic region of interest, which is usually a gene. We ran RVGDT correcting for sex and first two PCs.

#### 2.4.8 RareIBD

RareIBD (Sul et al. 2016) claims to be a program without restrictions on family size, type of trait, whether founders are genotyped, or whether unaffected individuals are genotyped. The method is inspired by non-parametric linkage analysis and looks for a rare variants whose segregation pattern among affected and unaffected individuals is different from the predicted distributions based on Mendelian inheritance and computes a statistic measuring the difference.

### 3 Results

#### 3.1 Simulated dataset

Results from the simulated dataset indicate that RVGDT, rareIBD and collapsing-based methods (Burden, CMC and CLP), provided more statistical power than the variance-component methods to detect association of perfectly segregating variants with disease status (**Table 4**).

In an hypothetical scenario of five families in which each one of these families presents perfect segregation with disease status for a different variant within the same gene (5FC×0NFC), transmission-disequilibrium based methods evaluate this association as significant (even after multiple test correction; e.g. RVGDT p-value=0.004; p-value after multiple test correction  $0.004 \times 9 = 0.036$ ). RVGDT reaches a ceiling p-value of  $1 \times 10^{-4}$ ; at 10 families carriers (FC) plus 15 families non-carriers (FNC). RVGDT was unable to produce a p-value smaller than  $9 \times 10^{-4}$ , therefore it is not possible to rank or determine the significance of genes with this p-value.



27 Similarly, RareIBD reports the same p-value for all simulated scenarios, which can be an artifact or a flaw of  
28 the program. Collapsing-based methods (Burden, CMC and CLP) started with significant p-values for the  
29 5FC×0NFC scenario, but as we added FNC in the analysis, the association became less significant. Then, as we  
30 increased the number of FC of segregating variants, the association became more significant. In our analyses,  
31 most variance-component tests could not work with the scenarios with only five families carrying the  
32 segregating variant; most of the tests only provided p-values once 25 families are included in the analysis  
33 (5FC×20FNC). After that, as we increased the number of FC of a segregating variants, the p-value became  
34 smaller. SKAT required 15FC×10FNC to report nominally significant p-values, GSKAT required 20FC×5FNC  
35 to report statistically significant p-values, FarVAT-CALPHA did not generate significant p-values, except if we  
36 used the BLUP correction; FarVAT SKATO reported p-values that were significant at 15FC×10FNC, and at  
37 5FC×20FNC if we used the BLUP correction. P-values from EPACTS-SKAT were not statistically significant  
38 after multiple test correction. FSKAT did not deal well with perfectly segregating scenarios; it did not provide  
39 p-values for a scenario of only five families all carriers of the segregating variant (5FC×0FNC – FSKAT p-  
40 value=NA), and after five families carrying the segregating variant, the program saturated giving no p-value.

41  
42 Overall, Transmission-disequilibrium tests and collapsing tests were the models that identified these simulated  
43 segregating variants as associated with the phenotype; the CMC model provided by FarVAT-BLUP was the one  
44 providing most genome-wide significant p-values, even in the 5FC×0FNC scenario.  
45

## 46 **3.2 Candidate genes - APOE**

47 We examined the performance of four gene-sets generated for the *APOE* gene with the twenty-two family-  
48 based gene-based methods in our entire familial cohort. Neither the entire set of polymorphic variants (set  
49 “gene” in Table 5) nor the set including only rare non-synonymous variants (set “HM” in Table 5) confer risk  
50 for these families. The association seems to be driven by the common *APOE*  $\epsilon 2$  and  $\epsilon 4$  variants, since only  
51 when these were considered, either alone (set “ $\epsilon 2\epsilon 4$ ” in Table 5) or in conjunction with the rest of rare non-  
52 synonymous variants (set “HM-  $\epsilon 2\epsilon 4$ ” in Table 5), most of the tests yielded a significant p-value (after multiple  
53 test correction). Only EPACTS-SKAT did not consider the *APOE*  $\epsilon 2$  and  $\epsilon 4$  variants as significantly associated,  
54 after multiple test correction, with our dataset (**Table 5**). The most significant association for *APOE*  $\epsilon 2$  and  $\epsilon 4$   
55 variants was reported by FarVAT-CMC test.  
56

## 57 **3.3 Genome-wide analyses**

58 Overall, we examined eight software and over 22 algorithms for genome-wide association analysis in our  
59 extended family dataset of 285 families and 1235 non-hispanic white individuals. We only included in the  
60 analysis non-synonymous SNPs with a  $MAF \leq 1\%$  and we corrected per sex and first two PCs. All 22  
61 algorithms were run using the same input dataset. The results for these 22 algorithms are described grouped per  
62 category, as detailed in the following sections. First, we compared the correction effect provided by four kinship  
63 matrices (**Figure 3A**). Second, we compare the performance of nine variance-component software and  
64 algorithms (**Figure 3B**). Third is the comparison of eight collapsing software and algorithms. Fourth, we  
65 compare two transmission-disequilibrium tests. We conclude the results section by providing a summary of the  
66 pros and cons encountered while running these methods. Overall, most of the gene-based methods tested  
67 seemed quite deflated. Only PedGene, FarVAT and Rare-IBD seem to provide values closer or above the  
68 expected under the null hypothesis. The most efficient in terms of power and p-value inflation appears to be  
69 FarVAT with BLUP correction.  
70

### 71 **3.3.1 Kinship matrices**

72 We tested the correction provided by four kinship matrices using the SKAT method with EMMAX correction  
73 implemented in the R package SKATv2. The four kinship matrices tested were pedigree calculation (PED),

Identity By State (IBS) estimation, Balding-Nichols (BN) estimation, and the kinship generated by EPACTS (HR) which is also based on BN algorithm (**Figure 3A**). **Table S3** offers a comparison of these kinships for FAM#1 and FAM#2 of our simulated dataset. For these analyses, we ran the SKAT-EMMAX method in our entire dataset, gene-wide and calculated a QQ plot and inflation factor ( $\lambda$ ) to obtain a general ideal of the behavior of each matrix. Matrices based on the BN algorithm seemed to have a similar performance (SKAT-BN  $\lambda=0.038$ , SKAT-HR  $\lambda=0.039$ , **Table 6**) although their concordance was lower than expected given they are based on the same algorithm (Pearson correlation (Pc)=0.85; Spearman correlation (Sc)=1). Although the PED matrix generates a more restrictive correction than the IBS matrix (SKAT-PED  $\lambda=0.36$ , SKAT-IBS  $\lambda=0.67$ , **Table 6**), these two tests have a similar overall performance as the p-values for the different genes are highly correlated (Pc=0.97; Sc=0.98), making the PED matrix a good surrogate for the IBS matrix. Finally, there were clear performance differences between the BN-type matrices (BN and HR) and the IBS-type matrices (IBS and PED), exemplified by the different top candidate genes (*NR1D1* for BN-type matrices and *CHRD* for IBS-type matrices) and by the correlation algorithms (SAKT-IBS vs SKAT-BN Pc=0.8; Sc=0.89). Overall, we found that the IBS matrix provided to our dataset the best balance between covariance-correction and overcorrection.

### 3.3.2 Collapsing tests

The collapsing methods tested from four different software (PedGene, FarVAT, EPACTS and GSKAT) were Burden, CMC and VT (**Figure 3c**). In order to compare the different tests, we followed a similar approach as above, and we ran the different software with the same imputed file and compared the  $\lambda$ .

In our analyses, the burden test by GSKAT presented the most deflated values; although the lambda does not illustrate so (GSKAT-Burden  $\lambda=1.71$ , **Table 6**) because of the initial inflation among the low or non-significant genes. EPACTS-CMC ( $\lambda=0.85$ ) and EPACTS-VT ( $\lambda=0.95$ ) provided values closer to the expected, and despite their QQ-plots seem to follow a similar trend, their correlation is weak (Pc=0.54; Sc=0.68), pointing to different top genes. The Burden and CMC methods by FarVAT and FarVAT-BLUP provided p-values closest to the expected (FarVAT-Burden  $\lambda=0.98$ ; FarVAT-CMC  $\lambda=0.99$ , FarVAT-BLUP-Burden  $\lambda=1.03$ ; FarVAT-BLUP-CMC  $\lambda=1.07$ ). The correlation for the gene p-values was higher between results generated by the same method (FarVAT-BLUP-CMC vs FarVAT-BLUP-Burden Pc=0.99; Sc=0.96; FarVAT-CMC vs FarVAT-Burden Pc=0.98; Sc=0.97) than between results generated using the same algorithm (FarVAT-BLUP-CMC vs FarVAT-CMC Pc=0.88; Sc=0.8; FarVAT-BLUP-Burden vs FarVAT-Burden Pc=0.85; Sc=0.77). PedGene in the burden model is the software that provided most significant p-values; however, these are clearly inflated compared to the predicted p-values (Pedgene-Burden  $\lambda=2.99$ , **Table 6**) and its results were not correlated with any other Collapsing test (Pc and Sc values < 0.1).

### 3.3.3 Variance component tests

This subset included all the Variance component-based methods available, CLP, CALPHA and SKAT, from six different software: PedGene, FarVAT, FSKAT, EPACTS, SKAT and GSKAT (**Figure 3c**). GSKAT was the software presenting more deflated values though the lambda does not illustrate this (GSKAT-SKAT  $\lambda=1.681$ , **Table 6**) because of the initial inflation among the low or non-significant genes. GSKAT was followed by SKAT and EPACTS which showed similar  $\lambda$  and performance-values for each gene (Pc=0.8, Sc=0.8, **Figure 4**). The CLP, CALPHA and SKATO methods by FarVAT and FarVAT-BLUP provided p-values closest to the expected (FarVAT-CLP  $\lambda=1.00$ ; FarVAT-CALPHA  $\lambda=1.15$ ; FarVAT-SKATO  $\lambda=1.02$ , FarVAT-BLUP-CLP  $\lambda=1.11$ ; FarVAT-BLUP-CALPHA  $\lambda=1.26$ ; FarVAT-BLUP-SKATO  $\lambda=1.10$ ). FarVAT-CALPHA, FarVAT-SKATO, FarVAT-BLUP-CALPHA and FarVAT-BLUP-SKATO pointed to the same top candidate gene (*CHRD*) (**Table 6**), although the overall p-value correlation is lower than expected considering they are based on the same algorithm (FarVAT-SKATO vs FarVAT-BLUP-SKATO Pc=0.6, Sc=0.7; FarVAT-CALPHA vs FarVAT-BLUP-CALPHA Pc=0.82 Sc=0.82, **Figure 4**). On the other hand, and despite the fact that FarVAT-CLP and FarVAT-BLUP-CLP have higher correlation (Pc=0.85, Sc=0.77), these two tests point to different top genes (FarVAT-CLP top gene is *MAS1L*, and FarVAT-BLIP-CLP top gene is *NLRP9*). PedGene in the SKAT model is the software that provided the most significant p-values, but we can observe how these are inflated

(Pedgene-SKAT  $\lambda=3.53$ , **Table 6**) and that its correlation with other variance component tests is low to null ( $P_c$  and  $Sc$  values  $< 0.2$ ).

### 3.3.4 Transmission disequilibrium tests

We have tested two transmission disequilibrium tests, RVGDT and Rare-IBD, which are designed to account for large extended families of arbitrary structure (**Figure 3d**). Of these two, RVGDT is the test that more closely approached the expected under the null ( $\lambda=0.99$ ), whereas Rare-IBD provided slightly inflated p-values ( $\lambda=1.450$ , **Table 6**). The correlation between these two methods was very low (Pearson correlation = 0.23, Spearman correlation = 0.17). A common issue with both methods is that we could see some stratification towards more significant p-values which made it difficult to determine a top significant gene.

### 3.3.5 PROS and COSN of the different gene-based methods

Among all the methods tested, EPACTS and FarVAT are the most user-friendly, time-efficient and versatile software. EPACTS is an all-in-one package that annotates the input file, generates the kinship matrix and performs gene-based analysis under different conditions (minor allele frequency and predicted functionality of the variant) with only tag specification. In addition, the program can be run on a genome-wide base or at smaller scale given genes or regions specified by the user. FarVAT can generate the kinship matrix by either using the pedigree relationships or using the genetic relationship among individuals. It does not annotate the input file and requires that the user provide their own set of genes and variants per gene to analyze; it allows the user to choose between BLUP (best linear unbiased prediction) or prevalence to estimate and incorporate random effects on the phenotype. FarVAT has initial conditioning that only takes founder-based MAF, i.e. when a genetic variant has its minor alleles only in non-founders (offspring), these numbers will not be counted. This is a big difference with respect to the other programs that take into account all variants regardless of their presence in founders or not. Since for many of our families we only had genetic data for siblings, i.e. we did not have genetic data for founders, we ran FarVAT with the “-freq all” option, so all variants would be included regardless if they are present in founders or not.

FSKAT, GSKAT and SKAT require of some R knowledge from the user, and are less flexible. For FSKAT and GSKAT the user has to provide a genotype, a phenotype, and a gene-set file. For SKAT the user has to additionally provide the kinship matrix. Because these programs were designed to run on a per gene basis, these take longer to compute and to be run on a genome-wide level than EPACTS or FarVAT, even if the user parallelizes computation. PedGene is also an R package that requires a genotype, a phenotype file with complete pedigree information (to generate the kinship matrix), and a gene-set file. PedGene provides phenotype adjustment by logistic regression on the trait of interest, but it does not allow for extra covariates, which prohibits correction by multiple PCs or other variables. RVGDT is a python based program, quite user-friendly since it is operated with simple command-line but is limited in its options. Similar to FSKAT, GSKAT and SKAT, it is designed to be run on a per-gene basis for which loops and parallelization have to be set up for genome-wide testing. The same goes for RareIBD which requires a genotype, a phenotype, and a Kinship coefficient file for each gene that the user wants to test. For each gene the program computes first statistics for each founder within each family and then calculates the gene-based p-value. The first step of this process can easily take between three to five minutes for families with less than 100 individuals; hence, the overall time for one gene is directly dependent on the number of families to test and the time required for a genome-wide analysis is proportional to the number of genes being tested. Although it is possible to parallelize the jobs using a high-performance cluster (if available) this program is the slowest of all tested.

One of the major drawbacks we found is that some of these programs do not accept missing data (FSKAT or RareIBD) or will not generate a p-value if the gene set contains only one variant (GSKAT, PedGene or FarVAT). FSKAT does not accept missing data, and although it calculates p-values for genes that only have one informative SNP (2154 one-SNP-gene), there were at least 75 (3.26%) of these one SNP-genes for which the returned p-value was “2”. GSKAT did not provide p-values for more than 1,875 one-SNP-genes. Pedgene also

73 had trouble generating p-values for 44 one-SNP-genes out of a total of 1,916 singletons. FarVAT did not  
74 generate a p-value for the 1,875 one-SNP-genes using the Burden and SKATO models but it generated p-values  
75 using the CMC and CLP models for the same 1,875 one-SNP-genes.

### 76 3.4 Candidate genes for FASe project

77 Our results indicate that transmission disequilibrium tests identify genes that have a Mendelian behavior,  
78 whereas collapsing and variance-component tests identify genes that confer risk for disease. Therefore, we  
79 decided to combine and compare results from all approaches to identify the genes with most consistent results  
80 (Table 7).

81  
82 PEDGENE provided the most significant p-values for *NTN5* (Pedgene-Burden p-value =  $5.80 \times 10^{-8}$ ; Pedgene-  
83 SKAT p-value =  $1.26 \times 10^{-8}$ ) and *ANKRD42* (Pedgene-Burden p-value =  $3.62 \times 10^{-7}$ ; Pedgene-SKAT p-value =  
84  $1.16 \times 10^{-7}$ ). However, the inflated p-values observed and low correlation with any of the other software tested  
85 using the same algorithms makes us suspicious of the validity of these results.

86  
87 *CHRD* was the gene with the third most significant p-value. *CHRD* had a p-value  $\leq 5 \times 10^{-7}$  in three different  
88 models (FarVAT-CALPHA, FarVAT-SKATO, FarVAT-BLUP-CALPHA). In addition, as we lowered the  
89 considered p-value threshold we found that more tests identified *CHRD* as a potential candidate gene associated  
90 with AD. When we lowered the threshold to suggestive genome-wide p-value (p-value  $\leq 5 \times 10^{-4}$ ) we found that  
91 seven different models identified *CHRD* as a gene significantly associated with AD. Following the same  
92 method we found that *CLCN2*, *MASIL* and *PTK2B* had p-values  $\leq 5 \times 10^{-5}$  in at least three tests, and if we  
93 lowered the threshold to  $\leq 5 \times 10^{-4}$  p-value, these genes were identified as significant by at least three additional  
94 tests.

95  
96 Among genes with a p-value  $\leq 5 \times 10^{-4}$ ; *CPAMD8* was identified by at least nine gene-based methods (FarVAT,  
97 FarVAT-BLUP and PedGene). The exact p-value for *CPAMD8* could not be estimated by RVGDT as it showed  
98 a p-value of  $9 \times 10^{-4}$ , which is the most significant p-value provided by this test. Therefore, we cannot conclude  
99 that *CPAMD8* presented a p-value  $\leq 5 \times 10^{-4}$  by RVGDT. *CHRD*, *CLCN2*, *MASIL*, *PTK2B* and *CPAMD8*,  
100 *NLRP9*, and *HDLBP* were also potential novel candidate genes for familial LOAD as they had p-values  $\leq 5 \times 10^{-4}$   
101 using at least five or more tests (Table 7).

102  
103 Since these were identified by multiple gene-based methods, we wanted to determine whether any of these  
104 seven candidate genes are involved in known AD pathways. Common variants in *PTK2B* have been associated  
105 with AD risk at genome-wide level (J.-C. Lambert et al. 2013). Our results indicate there are additional low-  
106 frequency and rare non-synonymous variants in *PTK2B* that are associated with AD risk in late-onset families.  
107 We used the GeneMANIA (<http://pages.genemania.org/>) algorithm on the seven candidate genes (*CHRD*,  
108 *MASIL*, *PTK2B*, *CPAMD8*, *NLRP9*, *CLCN2* and *HDLBP*) along with known AD-related genes (*APP*, *PSEN1*,  
109 *PSEN2*, *APOE*, *TREM2*, *PLD3*, *ADAM10*) which represent some of the AD genes and pathways (APP-  
110 metabolism and immune response). GeneMANIA is a software that looks for relationships among a list of given  
111 genes by searching within multiple publicly available biological datasets. These datasets include protein-  
112 protein, protein-DNA and genetic interactions, pathways, reactions, gene and protein expression data, protein  
113 domains and phenotypic screening profiles. We found that our candidate genes have genetic interactions and co-  
114 localization with known AD genes. *CHRD* and *PTK2B* are involved in “regulation of cell adhesion” like  
115 *ADAM10*; *PTK2B* is involved in “regulation of neurogenesis” like *APOE* and “perinuclear region of cytoplasm”  
116 like *APP*, *PSEN1* and *PSEN2*. Finally, *CLCN2* and *PTK2B* are connected through “regulation of ion transport”  
117 (Figure 5).

## 118 4 Discussion



20 The remaining missing heritability in AD, and in many complex diseases, may be found in very rare-variants  
21 for which discovery will require either large datasets (eg. the ADSP Discovery Phase which has over 10,000  
22 sequenced individuals) or datasets enriched for rare variants (such as families with history of AD). In this study,  
23 we present the most comprehensive performance analyses for multiple gene-based methods in 285 families with  
24 AD. Some of the current methods available are underpowered or too restrictive to detect genes significantly  
25 associated with this disease (**Figure 4**). Results from our simulated data (**Table 4**) show that only certain highly  
26 restricted scenarios provide gene-wide significant p-values in a family-based analysis; whereas, similar  
27 scenarios in a case-control study would result in gene-wide p-values. To circumvent this power issue, we relied  
28 on the combination of multiple evidence towards the same gene.

30 One key aspect to adapt gene-based analyses to a family-based context is to account for the population  
31 stratification and hidden relatedness that may appear due to the inherent nature of the dataset. To take into  
32 account this issue, gene-based algorithms must incorporate kinship matrices to model the relationships among  
33 samples. Therefore, an appropriate estimate of the kinship matrix is of utmost importance. In this work we show  
34 how different relationship matrices influence results. We tested the three most common types of kinship matrix,  
35 pedigree reconstruction (PED), identity by state (IBS), and Balding-Nichols (BN). We show that for a situation  
36 of complex incomplete families, correction using PED or BN matrices will lead to an overcorrection of the  
37 relationships decreasing the power of these tests (**Table 6, Figure 4A**).

39 In order to choose the best gene-based algorithm for analysis, it is important to take into account the nature  
40 (impact and directionality) of the variants that are being included in the test. Collapsing tests are powerful when  
41 a large proportion of variants are causal and effects are in the same direction. Variance-component tests are  
42 supposed to be more powerful than collapsing tests because these allow for admixture of risk and protective  
43 variants within the region being tested (Ionita-Laza et al. 2013). It is not practical to account for the nature of  
44 the variants included in each gene-set, and the true disease model is unknown and variable; hence, omnibus or  
45 combined tests such as SKAT-O would be desirable for genome-wide studies (Lee et al. 2012); however, most  
46 family-based methods do not incorporate the SKAT-O algorithm, except for FarVAT. Therefore, the best  
47 approach to perform genome-wide rare variant discovery is to combine different algorithms and look for  
48 common signatures across the tests performed. Nonetheless, we are aware that running all available tests is a  
49 time-consuming task that requires additional expertise and resources. In our analyses FarVAT, with the BLUP  
50 adjustment, provide the best results in terms of significant p-values and inflation, for genome-wide gene-based  
51 analysis; it is a fast software that provides results from multiple tests at the same time. The R version of SKAT  
52 or EPACTS, would be alternative valid choices, taking into account that these overcorrect and the p-value  
53 threshold should be lowered.

55 In this study, we identified *CHRD* as a candidate gene with a genome-wide significant p-value ( $5 \times 10^{-07}$ )  
56 reported by three tests, and another six genes that had a suggestive genome-wide p-value  $< 5 \times 10^{-04}$  in at least  
57 five and up to nine of the different test performed: *CLCN2*, *CPAMD8*, *HDLBP*, *MASIL*, *NLRP9* and *PTK2B*. In  
58 addition, these genes seem to have direct and indirect interactions (genetic interaction, co-localization or shared  
59 function) with known AD genes (*APP*, *PSEN1*, *PSEN2*, *APOE*, *TREM2*, *PLD3* and *ADAM10*).

61 *CHRD*, chordin, is a developmental protein, highly conserved, inhibiting the ventralizing activity of bone  
62 morphogenetic proteins, active during gastrulation, expressed in fetal and adult liver and cerebellum, associated  
63 with Cornelia de Lange syndrome (Smith et al. 1999). *CLCN2*, chloride voltage-gated channel 2, has several  
64 functions including the regulation of cell volume; membrane potential stabilization, signal transduction and  
65 transepithelial transport. It has been associated with different epilepsy modes (Saint-Martin et al. 2009; Cukier  
66 et al. 2014) and leukoencephalopathy (Gaitán-Peñas et al. 2017). *CHRD* and *CLCN2* show co-expression which  
67 could be due to their close location, both belong to a gene cluster at 3q27. Interestingly, *CLCN2* shows co-  
68 expression with *TREM2*, which other than being a risk gene for AD, is known to cause leukoencephalopathy in  
69 the PLOSL (polycystic lipomembranous osteodysplasia with sclerosing leukoencephalopathy) form, also known  
70 as Nasu-Hakola disease.



71  
72 *PTK2B*, was described as a GWAs hit locus in the largest GWAs meta-analysis conducted to date (Lambert et  
73 al. 2013), and later corroborated by others (Wang et al. 2015; Beecham et al. 2014). The protein encoded by  
74 *PTK2B* is a member of the focal adhesion kinase (FAK) family that can be activated by changes in intracellular  
75 calcium levels, which are disrupted in AD brains. Its activation regulates neuronal activity such as mitogen-  
76 activated protein kinase (MAPK) signaling (Rosenthal and Kamboh 2014). *PTK2B* could also be involved in  
77 hippocampal synaptic function (Lambert et al. 2013). Although there is no co-expression or genetic interaction  
78 between *CLCN2* and *PTK2B*, both are involved in regulation of ion transport. Additionally, *PTK2B* is involved  
79 in regulation of lipidic metabolic processes, like *APOE*, a cholesterol-related gene. Despite no association has  
80 yet been reported between *APOE* and *HDLBP*, the High-Density Lipoprotein Binding Protein plays a role in  
81 cell sterol metabolism, protecting cells from over-accumulation of cholesterol, which has been reported as risk  
82 factor for atherosclerotic vascular diseases.

83  
84 *CPAMD8* causes a Unique Form of Autosomal-Recessive Anterior Segment Dysgenesis (Cheong et al. 2016).  
85 No shared pathway association was found between *CPAMD8* and the known AD genes, but it seems to have a  
86 genetic interaction with *APP* (Lin et al. 2010). In our study *CPAMD8* was identified as a candidate gene (with  
87 p-value  $< 1 \times 10^{-4}$ ) for AD by at least nine gene-based methods from different software, and we found that  
88 several variants within this gene show varying degrees of perfect segregation in more than twenty families.  
89 Variant p.(Ser1103Ala) segregates with disease status in two families with two and three carriers respectively,  
90 and is present in another two families. Variant p.(His465Arg) segregates with disease status in five families  
91 with two or three carriers per family and is present in another 11 families. Variant p.(Arg1380Cys) is private to  
92 a family with three carriers, p.(Ala1492Pro) is private to a family with five carriers, and p.(Val521Met) is  
93 private to a family with three carriers.

94  
95 We have reviewed over 22 algorithms from eight different software available for the gene-based analysis in  
96 complex families. After a thorough examination of these tests performance under different scenarios, we present  
97 a methodology to identify genes associated with the studied phenotype. We have applied this methodology to  
98 285 European-American families affected with late onset Alzheimer disease (LOAD). We have identified six  
99 candidate genes with suggestive or significant genome-wide p-values and we are confident that some of these  
100 genes are truly involved on AD pathology.

101

## 5 Conflict of Interest statement

The authors have declared that no competing interests exist

## 6 Author contributions statement

## 7 Funding

This work was supported by grants from the National Institutes of Health (R01-AG044546, P01-AG003991, and RF1-AG053303), the Alzheimer Association (NIRG-11-200110, BAND-14-338165 and BFG-15-362540) and the JPB Foundation. The recruitment and clinical characterization of research participants at Washington University were supported by NIH P50-AG05681, P01-AG03991, and P01-AG026276. Samples from the National Cell Repository for Alzheimer's Disease (NCRAD), which receives government support under a cooperative agreement grant (U24-AG21886) awarded by the National Institute on Aging (NIA), were used in this study. NIALOAD samples were collected under a cooperative agreement grant (U24-AG026395) awarded by the National Institute on Aging.

We thank the Genome Technology Access Center in the Department of Genetics at Washington University School of Medicine for help with genomic analysis. The Center is partially supported by NCI Cancer Center Support Grant #P30 CA91842 to the Siteman Cancer Center and by ICTS/CTSA Grant# UL1TR000448 from the National Center for Research Resources (NCRR), a component of the National Institutes of Health (NIH), and NIH Roadmap for Medical Research. This work was supported by access to equipment made possible by the Hope Center for Neurological Disorders and the Departments of Neurology and Psychiatry at Washington University School of Medicine.

## 8 Acknowledgments

We thank contributors who collected samples used in this study, as well as patients and their families, whose help and participation made this work possible. Members of the National Institute on Aging Late-Onset Alzheimer Disease/National Cell Repository for Alzheimer Disease (NIA-LOAD NCRAD) Family Study Group include the following: Richard Mayeux, MD, MSc; Martin Farlow, MD; Tatiana Foroud, PhD; Kelley Faber, MS; Bradley F. Boeve, MD; Neill R. Graff-Radford, MD; David A. Bennett, MD; Robert A. Sweet, MD; Roger Rosenberg, MD; Thomas D. Bird, MD; Carlos Cruchaga, PhD; and Jeremy M. Silverman, PhD.

The Alzheimer's Disease Sequencing Project (ADSP) is comprised of two Alzheimer's Disease (AD) genetics consortia and three National Human Genome Research Institute (NHGRI) funded Large Scale Sequencing and Analysis Centers (LSAC). The two AD genetics consortia are the Alzheimer's Disease Genetics Consortium (ADGC) funded by NIA (U01 AG032984), and the Cohorts for Heart and Aging Research in Genomic Epidemiology (CHARGE) funded by NIA (R01 AG033193), the National Heart, Lung, and Blood Institute (NHLBI), other National Institute of Health (NIH) institutes and other foreign governmental and non-governmental organizations. The Discovery Phase analysis of sequence data is supported through U01AG047133 (to Drs. Schellenberg, Farrer, Pericak-Vance, Mayeux, and Haines); U01AG049505 to Dr. Seshadri; U01AG049506 to Dr. Boerwinkle; U01AG049507 to Dr. Wijsman; and U01AG049508 to Dr. Goate and the Discovery Extension Phase analysis is supported through U01AG052411 to Dr. Goate, U01AG052410 to Dr. Pericak-Vance and U01 AG052409 to Drs. Seshadri and Fornage. Data generation and harmonization in the Follow-up Phases is supported by U54AG052427 (to Drs. Schellenberg and Wang).

The ADGC cohorts include: Adult Changes in Thought (ACT), the Alzheimer's Disease Centers (ADC), the Chicago Health and Aging Project (CHAP), the Memory and Aging Project (MAP), Mayo Clinic (MAYO), Mayo Parkinson's Disease controls, University of Miami, the Multi-Institutional Research in Alzheimer's Genetic Epidemiology Study (MIRAGE), the National Cell Repository for Alzheimer's Disease (NCRAD), the

16 National Institute on Aging Late Onset Alzheimer's Disease Family Study (NIA-LOAD), the Religious Orders  
17 Study (ROS), the Texas Alzheimer's Research and Care Consortium (TARC), Vanderbilt University/Case  
18 Western Reserve University (VAN/CWRU), the Washington Heights-Inwood Columbia Aging Project  
19 (WHICAP) and the Washington University Sequencing Project (WUSP), the Columbia University Hispanic-  
20 Estudio Familiar de Influencia Genetica de Alzheimer (EFIGA), the University of Toronto (UT), and Genetic  
21 Differences (GD).

22  
23 The CHARGE cohorts are supported in part by National Heart, Lung, and Blood Institute (NHLBI)  
24 infrastructure grant HL105756 (Psaty), RC2HL102419 (Boerwinkle) and the neurology working group is  
25 supported by the National Institute on Aging (NIA) R01 grant AG033193. The CHARGE cohorts participating  
26 in the ADSP include the following: Austrian Stroke Prevention Study (ASPS), ASPS-Family study, and the  
27 Prospective Dementia Registry-Austria (ASPS/PRODEM-Aus), the Atherosclerosis Risk in Communities  
28 (ARIC) Study, the Cardiovascular Health Study (CHS), the Erasmus Rucphen Family Study (ERF), the  
29 Framingham Heart Study (FHS), and the Rotterdam Study (RS). ASPS is funded by the Austrian Science Fond  
30 (FWF) grant number P20545-P05 and P13180 and the Medical University of Graz. The ASPS-Fam is funded by  
31 the Austrian Science Fund (FWF) project I904, the EU Joint Programme - Neurodegenerative Disease Research  
32 (JPND) in frame of the BRIDGET project (Austria, Ministry of Science) and the Medical University of Graz  
33 and the Steiermärkische Krankenanstalten Gesellschaft. PRODEM-Austria is supported by the Austrian  
34 Research Promotion agency (FFG) (Project No. 827462) and by the Austrian National Bank (Anniversary Fund,  
35 project 15435. ARIC research is carried out as a collaborative study supported by NHLBI contracts  
36 (HHSN268201100005C, HHSN268201100006C, HHSN268201100007C, HHSN268201100008C,  
37 HHSN268201100009C, HHSN268201100010C, HHSN268201100011C, and HHSN268201100012C).  
38 Neurocognitive data in ARIC is collected by U01 2U01HL096812, 2U01HL096814, 2U01HL096899,  
39 2U01HL096902, 2U01HL096917 from the NIH (NHLBI, NINDS, NIA and NIDCD), and with previous brain  
40 MRI examinations funded by R01-HL70825 from the NHLBI. CHS research was supported by contracts  
41 HHSN268201200036C, HHSN268200800007C, N01HC55222, N01HC85079, N01HC85080, N01HC85081,  
42 N01HC85082, N01HC85083, N01HC85086, and grants U01HL080295 and U01HL130114 from the NHLBI  
43 with additional contribution from the National Institute of Neurological Disorders and Stroke (NINDS).  
44 Additional support was provided by R01AG023629, R01AG15928, and R01AG20098 from the NIA. FHS  
45 research is supported by NHLBI contracts N01-HC-25195 and HHSN268201500001I. This study was also  
46 supported by additional grants from the NIA (R01s AG054076, AG049607 and AG033040 and NINDS (R01  
47 NS017950). The ERF study as a part of EUROSPAN (European Special Populations Research Network) was  
48 supported by European Commission FP6 STRP grant number 018947 (LSHG-CT-2006-01947) and also  
49 received funding from the European Community's Seventh Framework Programme (FP7/2007-2013)/grant  
50 agreement HEALTH-F4-2007-201413 by the European Commission under the programme "Quality of Life and  
51 Management of the Living Resources" of 5th Framework Programme (no. QLG2-CT-2002-01254). High-  
52 throughput analysis of the ERF data was supported by a joint grant from the Netherlands Organization for  
53 Scientific Research and the Russian Foundation for Basic Research (NWO-RFBR 047.017.043). The Rotterdam  
54 Study is funded by Erasmus Medical Center and Erasmus University, Rotterdam, the Netherlands Organization  
55 for Health Research and Development (ZonMw), the Research Institute for Diseases in the Elderly (RIDE), the  
56 Ministry of Education, Culture and Science, the Ministry for Health, Welfare and Sports, the European  
57 Commission (DG XII), and the municipality of Rotterdam. Genetic data sets are also supported by the  
58 Netherlands Organization of Scientific Research NWO Investments (175.010.2005.011, 911-03-012), the  
59 Genetic Laboratory of the Department of Internal Medicine, Erasmus MC, the Research Institute for Diseases in  
60 the Elderly (014-93-015; RIDE2), and the Netherlands Genomics Initiative (NGI)/Netherlands Organization for  
61 Scientific Research (NWO) Netherlands Consortium for Healthy Aging (NCHA), project 050-060-810. All  
62 studies are grateful to their participants, faculty and staff. The content of these manuscripts is solely the  
63 responsibility of the authors and does not necessarily represent the official views of the National Institutes of  
64 Health or the U.S. Department of Health and Human Services.  
65

06 The three LSACs are: the Human Genome Sequencing Center at the Baylor College of Medicine (U54  
07 HG003273), the Broad Institute Genome Center (U54HG003067), and the Washington University Genome  
08 Institute (U54HG003079).

09  
10 Biological samples and associated phenotypic data used in primary data analyses were stored at Study  
11 Investigators institutions, and at the National Cell Repository for Alzheimer's Disease (NCRAD,  
12 U24AG021886) at Indiana University funded by NIA. Associated Phenotypic Data used in primary and  
13 secondary data analyses were provided by Study Investigators, the NIA funded Alzheimer's Disease Centers  
14 (ADCs), and the National Alzheimer's Coordinating Center (NACC, U01AG016976) and the National Institute  
15 on Aging Genetics of Alzheimer's Disease Data Storage Site (NIAGADS, U24AG041689) at the University of  
16 Pennsylvania, funded by NIA, and at the Database for Genotypes and Phenotypes (dbGaP) funded by NIH. This  
17 research was supported in part by the Intramural Research Program of the National Institutes of health, National  
18 Library of Medicine. Contributors to the Genetic Analysis Data included Study Investigators on projects that  
19 were individually funded by NIA, and other NIH institutes, and by private U.S. organizations, or foreign  
20 governmental or nongovernmental organizations.

21  
22



## 9 References

- Balding, D.J., and Nichols, R.A. (1995). A Method for Quantifying Differentiation between Populations at Multi-Allelic Loci and Its Implications for Investigating Identity and Paternity. *Genetica* 96, 3–12
- Bansal, V., Libiger, O., Torkamani, A., Schork, N.J. (2010). Statistical Analysis Strategies for Association Studies Involving Rare Variants. *Nature Reviews. Genetics* 11 773–85. doi.org/10.1038/nrg2867
- Beecham, G.W., Hamilton K., Naj, A.C., Martin, E.R. Huentelman, M., Myers, A.J., et al. (2014). Genome-Wide Association Meta-Analysis of Neuropathologic Features of Alzheimer’s Disease and Related Dementias. *PLoS Genet.* 10(9):e1004606. doi.org/10.1371/journal.pgen.1004606.
- Wei-Min, C., Manichaikul, A., Rich, S.S. (2009) A Generalized Family-Based Association Test for Dichotomous Traits. *Am. J. Hum. Genet.* 85,364–376. doi.org/10.1016/j.ajhg.2009.08.003
- Sek-Shir, C., Hentschel, L., Davidson, A.E., Gerrelli, D., Davie, R., Rizzo, R., et al. (2016). Mutations in CPAMD8 Cause a Unique Form of Autosomal-Recessive Anterior Segment Dysgenesis. *Am. J.Hum. Genet.*99,1338–1352. doi.org/10.1016/j.ajhg.2016.09.022
- Choi, S., Lee, S., Cichon, S., Nöthen, M.M., Lange, C., Park, T., Won, S. (2014). FARVAT: A Family-Based Rare Variant Association Test. *Bioinformatics* 30, 3197–3205. doi.org/10.1093/bioinformatics/btu496
- Cingolani, P., Platts, A., Lily, L., Melissa Coon, W., Nguyen, T., Wang, L., et al. (2012). A Program for Annotating and Predicting the Effects of Single Nucleotide Polymorphisms, SnpEff: SNPs in the Genome of *Drosophila Melanogaster* Strain w1118; Iso-2; Iso-3. *Fly* 6, 80–92. doi.org/10.4161/fly.19695
- Cirulli, E.T., Goldstein, D.B. (2010). Uncovering the Roles of Rare Variants in Common Disease through Whole-Genome Sequencing. *Nat. Rev. Genet.* 11, 415-425. doi.org/10.1038/nrg2779.
- Cruchaga, C., Del-Aguila, J.L. Saef, B., Black, K., Fernandez, M.V., Budde, J., et al. (2017). Polygenic Risk Score of Sporadic Late-Onset Alzheimer’s Disease Reveals a Shared Architecture with the Familial and Early-Onset Forms. *Alzheimers Dement.* doi.org/10.1016/j.jalz.2017.08.013.
- Cruchaga, C., Haller, G., Chakraverty, S., Mayo, K., Vallania, F.L.M., Mitra, R.D. et al. (2012). Rare Variants in APP, PSEN1 and PSEN2 Increase Risk for AD in Late-Onset Alzheimer’s Disease Families. *PloS One* 7 (2):e31039. doi.org/10.1371/journal.pone.0031039.
- Cruchaga, C., Celeste, M.K., Jin, S.C., Benitez, B.A., Cai, Y., Guerreiro, R. et al. (2014). Rare Coding Variants in the Phospholipase D3 Gene Confer Risk for Alzheimer’s Disease. *Nature* 505, 550–554. doi.org/10.1038/nature12825.
- Cukier, H.N., Dueker, N.D., Slifer, S.H., Lee, J.M., Whitehead, P.L, Lalanne, E., et al. (2014). Exome Sequencing of Extended Families with Autism Reveals Genes Shared across Neurodevelopmental and Neuropsychiatric Disorders. *Mol Autism* 5:1. doi.org/10.1186/2040-2392-5-1.
- De, G., Yip, W., Ionita-Laza, I., Laird, N., Amos, C.I. (2013). Rare Variant Analysis for Family-Based Design. *PLoS ONE* 8. doi.org/10.1371/journal.pone.0048495.
- Farrer, L.A., Cupples, L.A., Haines, J.L., Hyman, B., Kukull, W.A., Mayeux, R., et. al. (1997). Effects of Age, Sex, and Ethnicity on the Association between Apolipoprotein E Genotype and Alzheimer Disease. A Meta-Analysis. APOE and Alzheimer Disease Meta Analysis Consortium. *JAMA* 278, 1349–1356.
- Fernández, M. V., Kim, J.H., Budde, J.P., Black, K., Medvedeva, A., Saef, B., et al. (2017). Analysis of Neurodegenerative Mendelian Genes in Clinically Diagnosed Alzheimer Disease. Edited by Amanda J. Myers. *PLOS Genetics* 13 (11):e1007045. doi.org/10.1371/journal.pgen.1007045.
- Frazer, K.A., Murray, S.S., Schork, N.J., Topolm E.J. (2009). Human Genetic Variation and Its Contribution to Complex Traits. *Nat. Rev. Genet.* 10, 241–251. doi.org/10.1038/nrg2554.
- Gaitán-Peñas, H., Apaja, P.M., Arnedo, T., Castellanos, A., Elorza-Vidal, X., Soto, D., et al. (2017). Leukoencephalopathy-Causing *CLCN2* Mutations Are Associated with Impaired Cl<sup>-</sup> Channel Function and Trafficking. *J. Physiol* 595, 6993–7008. doi.org/10.1113/JP275087.
- Guerreiro, R. J., Lohmann, E., Brás, J.M., Gibbs, J.R., Rohrer, J.D., Gurunlian, N., et al. (2013). Using Exome Sequencing to Reveal Mutations in TREM2 Presenting as a Frontotemporal Dementia-like Syndrome without Bone Involvement. *JAMA Neurology* 70, 78–84. doi.org/10.1001/jamaneurol.2013.579.
- He, Z., Zhang, D., Renton, A.E., Li, B., Zhao, L., Wang, G.T., et al. (2017). The Rare-Variant Generalized Disequilibrium Test for Association Analysis of Nuclear and Extended Pedigrees with Application to



- 53 Alzheimer Disease WGS Data. *Am. J. Hum. Genet.* 100, 193-204. doi.org/10.1016/j.ajhg.2016.12.001.
- 54 Steve, H., Xu, X., Laird, N.M. (2001). The Family Based Association Test Method: Strategies for Studying
- 55 General Genotype–phenotype Associations. *Eur. J. Hum. Genet.* 9, 301–306.
- 56 doi.org/10.1038/sj.ejhg.5200625.
- 57 Ionita-Laza, I., Lee, S., Makarov, V., Buxbaum, J.D., Lin, X. (2013). Family-Based Association Tests for
- 58 Sequence Data, and Comparisons with Population-Based Association Tests. *Eur. J. Hum. Genet.* 21, 1158–
- 59 1162. doi.org/10.1038/ejhg.2012.308.
- 70 Kang, H.M., Sul, J.H., Service, S.K., Zaitlen, N.A., Kong, S., Freimer, N.B., et al. (2010). Variance Component
- 71 Model to Account for Sample Structure in Genome-Wide Association Studies. *Nat. Genet.* 42, 348–54.
- 72 doi.org/10.1038/ng.548.
- 73 Kazma, R., Bailey, J.N. (2011). Population-Based and Family-Based Designs to Analyze Rare Variants in
- 74 Complex Diseases. *Genet. Epidemiol.* 35 Suppl 1. doi.org/10.1002/gepi.20648.
- 75 Laird, N.M., Horvath, S., Xu, X. (2000). Implementing a Unified Approach to Family-Based Tests of
- 76 Association. *Genet. Epidemiol.* 19 Supple 1. doi.org/10.1002/1098-2272(2000)19:1
- 77 Laird, N.M., Lange, C. (2006). Family-Based Designs in the Age of Large-Scale Gene-Association Studies.
- 78 *Nat. Rev. Genet.* 7, 385–394. doi.org/10.1038/nrg1839.
- 79 Lambert, J.C., Ibrahim-Verbaas, C.A., Harold, D., Naj, A.C., Sims, R., Bellenguez, C., et al. (2013). Meta-
- 80 Analysis of 74,046 Individuals Identifies 11 New Susceptibility Loci for Alzheimer’s Disease. *Nat. Genet.*
- 81 45, 1452–1458. doi.org/10.1038/ng.2802.
- 82 Lange, C., Laird, N.M. (2002). On a General Class of Conditional Tests for Family-Based Association Studies
- 83 in Genetics: The Asymptotic Distribution, the Conditional Power, and Optimality Considerations. *Genet.*
- 84 *Epidemiol.* 23, 165–180. doi.org/10.1002/gepi.209.
- 85 Lee, S., Wu, M.C., Lin, X. (2012). Optimal Tests for Rare Variant Effects in Sequencing Association Studies.
- 86 *Biostatistics* 13 (4):762–75. doi.org/10.1093/biostatistics/kxs014.
- 87 Lee, S., Emond, M.J., Bamshad, M.J., Barnes, K.C., Rieder, M.J., Nickerson, D.A., et al. (2012). Optimal
- 88 Unified Approach for Rare-Variant Association Testing with Application to Small-Sample Case-Control
- 89 Whole-Exome Sequencing Studies. *Am. J. Hum. Genet.* 91, 224–237. doi.org/10.1016/j.ajhg.2012.06.007.
- 90 Lee, S., Abecasis, G.R., Boehnke, M., Lin, X. (2014). Rare-Variant Association Analysis: Study Designs and
- 91 Statistical Tests. *Am. J. Hum. Genet.* 95, 5–23. doi.org/10.1016/j.ajhg.2014.06.009.
- 92 Lek, M., Karczewski, K.J., Minikel, E.V., Samocha, K.E., Banks, E., Fennell, T., et al. (2016). Analysis of
- 93 Protein-Coding Genetic Variation in 60,706 Humans. *Nature* 536, 285–291. doi.org/10.1038/nature19057.
- 94 Li, B., Leal, S.M. (2008). Methods for Detecting Associations with Rare Variants for Common Diseases:
- 95 Application to Analysis of Sequence Data. *Am. J. Hum. Genet.* 83, 311–21.
- 96 doi.org/10.1016/j.ajhg.2008.06.024.
- 97 Li, M., Boehnke, M., Abecasis, G.R. (2006). Efficient Study Designs for Test of Genetic Association Using
- 98 Sibship Data and Unrelated Cases and Controls. *Am. J. Hum. Genet.* 78, 778–792.
- 99 doi.org/10.1086/503711.
- 100 Lin, A., Wang, R.T., Ahn, S., Park, C.C., Smith, D.J. (2010). A Genome-Wide Map of Human Genetic
- 101 Interactions Inferred from Radiation Hybrid Genotypes. *Genome Res* 20, 1122-1132.
- 102 doi.org/10.1101/gr.104216.109.
- 103 Manolio, T., Francis, A., Collins, S., Cox, N.J., Goldstein, D.B., Hindorff, L.A. (2009). Finding the Missing
- 104 Heritability of Complex Diseases. *Nature* 461, 747–753. doi.org/10.1038/nature08494.
- 105 Morgenthaler, S., William G. T. (2007). A Strategy to Discover Genes That Carry Multi-Allelic or Mono-
- 106 Allelic Risk for Common Diseases: A Cohort Allelic Sums Test (CAST). *Mutat. Res.* 615, 28–56.
- 107 doi.org/10.1016/j.mrfmmm.2006.09.003.
- 108 Neale, B.M., Rivas, M.A., Voight, B.F., Altshuler, D., Devlin, B., Orho-Melander, M., et al. (2011). Testing for
- 109 an Unusual Distribution of Rare Variants. *PLoS Genet.* 7(3):e1001322.
- 110 doi.org/10.1371/journal.pgen.1001322.
- 111 Neale, B.M., Sham, P.C. (2004). The Future of Association Studies: Gene-Based Analysis and Replication. *Am.*
- 112 *J. Hum. Genet.* 75, 353–362. doi.org/10.1086/423901.
- 113 Ott, J., Kamatani, Y., Lathrop, M. (2011). Family-based designs for genome-wide Association Studies. *Nat.*

- 14 *Rev. Genet.* 12, 465–474. doi.org/10.1038/nrg2989.
- 15 Price, A.L., Kryukov, G.V., de Bakker, P.I.W., Purcell, S.M., Staples, J., Wei, L.J., et al. (2010). Pooled  
16 Association Tests for Rare Variants in Exon-Resequencing Studies. *Am. J. Hum. Genet.* 86, 832–838.  
17 doi.org/10.1016/j.ajhg.2010.04.005.
- 18 R Core Team (2017). R: A language and environment for statistical computing. R Foundation for Statistical  
19 Computing, Vienna, Austria. URL [www.R-project.org/](http://www.R-project.org/)
- 20 Ridge, P.G., Hoyt, K.B., Boehme, K., Mukherjee, S., Crane, P.K., Haines, J.L., et al. (2016). Assessment of the  
21 Genetic Variance of Late-Onset Alzheimer’s Disease. *Neurobiol. Aging* 41, 200.e13–20.  
22 doi.org/10.1016/j.neurobiolaging.2016.02.024.
- 23 Rosenthal, S.L., Kambou, M.I. (2014). Late-Onset Alzheimer’s Disease Genes and the Potentially Implicated  
24 Pathways. *Curr. Genet. Med. Rep.* 22, 85–101. doi.org/10.1007/s40142-014-0034-x.
- 25 Saint-Martin, C., Gauvain, G., Teodorescu, G., Gourfinkel-An, I., Fedirko, E., Weber, Y.G., et al. (2009). Two  
26 Novel CLCN2 Mutations Accelerating Chloride Channel Deactivation Are Associated with Idiopathic  
27 Generalized Epilepsy. *Hum. Mutat.* 30, 397–405. doi.org/10.1002/humu.20876.
- 28 Schaid, D.J., McDonnell, S.K., Sinnwell, J.P., Thibodeau, S.N. (2013). Multiple Genetic Variant Association  
29 Testing by Collapsing and Kernel Methods With Pedigree or Population Structured Data. *Genet.*  
30 *Epidemiol.* 37 409–418. doi.org/10.1002/gepi.21727.
- 31 Sims, R., van der Lee, S.J., Naj, A.C., Bellenguez, C., Badarinarayan, N., Jakobsdottir, J., et al. (2017). Rare  
32 Coding Variants in PLCG2, ABI3, and TREM2 Implicate Microglial-Mediated Innate Immunity in  
33 Alzheimer’s Disease. *Nat. Genet.* 49, 1373–1384. doi.org/10.1038/ng.3916.
- 34 Smith, M., Herrell, S., Lusher, M., Lako, L., Simpson, C., Wiestner, A. (1999) Genomic Organisation of the  
35 Human Chordin Gene and Mutation Screening of Candidate Cornelia de Lange Syndrome Genes. *Hum.*  
36 *Genet.* 105, 104–111.
- 37 Sul, J. H., Cade, B.E., Cho, M.H., Qiao, D., Silverman, E.K., Redline, S. et al. (2016). Increasing Generality and  
38 Power of Rare-Variant Tests by Utilizing Extended Pedigrees. *Am. J. Hum. Genet.* 99, 846–859.  
39 doi.org/10.1016/j.ajhg.2016.08.015.
- 40 Thornton, T., McPeck, M.S. (2007). Case-Control Association Testing with Related Individuals: A More  
41 Powerful Quasi-Likelihood Score Test. *Am. J. Hum. Genet.* 81, 321–337. doi.org/10.1086/519497.
- 42 Wang, X., Lopez, O.L., Sweet, R.A., Becker, J.T., Dekosky, S.T., Barmada, M.M., et al. (2015). Genetic  
43 Determinants of Disease Progression in Alzheimer’s Disease. *J. Alzheimers Dis.* 43, 649–655.  
44 doi.org/10.3233/JAD-140729.
- 45 Wang, X., Lee, S., Zhu, X., Redline, S., Lin, X. (2013). GEE-Based SNP Set Association Test for Continuous  
46 and Discrete Traits in Family-Based Association Studies. *Genet. Epidemiol.* 37, 778–86.  
47 doi.org/10.1002/gepi.21763.
- 48 Wijsman, E.M., Pankratz, N.D., Choi, Y., Rothstein, J.H., Faber, K.M., Cheng, R., et al. (2011). Genome-Wide  
49 Association of Familial Late-Onset Alzheimer’s Disease Replicates BIN1 and CLU and Nominates  
50 CUGBP2 in Interaction with APOE. *PLoS Genetics* 7 (2):e1001308.  
51 doi.org/10.1371/journal.pgen.1001308.
- 52 Wickham, H. (2009) ggplot2: Elegant Graphics for Data Analysis. Springer-Verlag New York
- 53 Wu, M. C., Lee, S., Cai, T., Li, Y., Boehnke, M., Lin, X. (2011) Rare-Variant Association Testing for  
54 Sequencing Data with the Sequence Kernel Association Test. *Am. J. Hum. Genet.* 89, 82–93.  
55 doi.org/10.1016/j.ajhg.2011.05.029.
- 56 Yan, Q., Tiwari, H.K., Yi, N., Gao, G., Zhang, K., Lin, W.Y., et al. (2015). A Sequence Kernel Association  
57 Test for Dichotomous Traits in Family Samples under a Generalized Linear Mixed Model. *Hum. Hered.*  
58 79, 60–68. doi.org/10.1159/000375409.
- 59 Zhou, X., Stephens, M. (2012). Genome-Wide Efficient Mixed-Model Analysis for Association Studies. *Nat.*  
60 *Genet.* 44, 821–824. doi.org/10.1038/ng.2310.

**Table 1.** Demographic data for the familial dataset employed in this study.

|          | N    | *Age $\pm$<br>SD | *Age<br>range | % Fe | %<br>APOE4 |
|----------|------|------------------|---------------|------|------------|
| Cases    | 824  | 73 $\pm$ 7       | 48-99         | 63%  | 73%        |
| Controls | 411  | 83 $\pm$ 9       | 39-104        | 59%  | 51%        |
| Total    | 1235 | 77 $\pm$ 10      | 39-104        | 61%  | 65%        |

\* Age At Onset (AAO) for cases and Age at Last Assessment (ALA) for controls.

**Table 2.** Number of samples for which whole genome sequencing (WGS) or whole exome sequencing (WES) was performed, with detail of the exon library kits employed in this study.

| Exon library kit                            | WGS | WES  |
|---------------------------------------------|-----|------|
| WGS                                         | 153 |      |
| Agilent's SureSelect Human All Exon kits V3 | 0   | 28   |
| Agilent's SureSelect Human All Exon kits V5 | 0   | 665  |
| Roche VCRome                                | 0   | 389  |
| Total                                       | 153 | 1082 |

**Table 3.** Relationship of programs and models tested according to their main features and kinship matrix that they use.

|             | Collapsing |     |    | Variance-component |      | Combined | Transmission-disequilibrium | Kinship |     |     |
|-------------|------------|-----|----|--------------------|------|----------|-----------------------------|---------|-----|-----|
|             | Burden     | CMC | VT | C-ALPHA            | SKAT | SKATO    |                             | BN      | IBS | Ped |
| EPACTS      |            | X   | X  |                    | X    |          |                             | X       |     |     |
| RVGDT       |            |     |    |                    |      |          | X                           |         |     |     |
| SKAT-v2     |            |     |    |                    | X    |          |                             | X       | X   | X   |
| GSKAT       | X          |     |    |                    | X    |          |                             |         |     | X   |
| FSKAT       |            |     |    |                    | X    |          |                             |         |     | X   |
| FarVat-Adj  | X          | X   |    | X                  |      | X        |                             |         |     |     |
| FarVat-BLUP | X          | X   |    | X                  |      | X        |                             |         |     |     |
| Pedgne      | X          |     |    |                    | X    |          |                             |         |     |     |
| RareIbd     |            |     |    |                    |      |          | X                           |         |     |     |



**Table 4.** Representation of the segregation pattern of the simulated gene. One (1) means that all cases within the family are carriers of the variant. Zero (0) means that the variant is not present in that family.

|       | GENE-A |      |      |      |      |
|-------|--------|------|------|------|------|
|       | SNP1   | SNP2 | SNP3 | SNP4 | SNP5 |
| Fam1  | 1      | 0    | 0    | 0    | 0    |
| Fam2  | 0      | 1    | 0    | 0    | 0    |
| Fam3  | 0      | 0    | 1    | 0    | 0    |
| Fam4  | 0      | 0    | 0    | 1    | 0    |
| Fam5  | 0      | 0    | 0    | 0    | 1    |
| Fam6  | 1      | 0    | 0    | 0    | 0    |
| Fam7  | 0      | 1    | 0    | 0    | 0    |
| Fam8  | 0      | 0    | 1    | 0    | 0    |
| Fam9  | 0      | 0    | 0    | 1    | 0    |
| Fam10 | 0      | 0    | 0    | 0    | 1    |
| Fam11 | 1      | 0    | 0    | 0    | 0    |
| Fam12 | 0      | 1    | 0    | 0    | 0    |
| Fam13 | 0      | 0    | 1    | 0    | 0    |
| Fam14 | 0      | 0    | 0    | 1    | 0    |
| Fam15 | 0      | 0    | 0    | 0    | 1    |
| Fam16 | 1      | 0    | 0    | 0    | 0    |
| Fam17 | 0      | 1    | 0    | 0    | 0    |
| Fam18 | 0      | 0    | 1    | 0    | 0    |
| Fam19 | 0      | 0    | 0    | 1    | 0    |
| Fam20 | 0      | 0    | 0    | 0    | 1    |
| Fam21 | 1      | 0    | 0    | 0    | 0    |
| Fam22 | 0      | 1    | 0    | 0    | 0    |
| Fam23 | 0      | 0    | 1    | 0    | 0    |
| Fam24 | 0      | 0    | 0    | 1    | 0    |
| Fam25 | 0      | 0    | 0    | 0    | 1    |

**Table 4.** Gene-based p-values for the simulated dataset under different scenarios for the gene-based methods tested in the subset of 25 families.

| SET        | GSKA<br>T          | FSKA<br>T | SKA<br>T | RVGD<br>T          | PedGene  |                        | Rare<br>IBD         | EPACTS<br>* | FarVAT                 |                       |            |                       |                       | FarVAT-BLUP            |                        |                       |                        |                        |
|------------|--------------------|-----------|----------|--------------------|----------|------------------------|---------------------|-------------|------------------------|-----------------------|------------|-----------------------|-----------------------|------------------------|------------------------|-----------------------|------------------------|------------------------|
|            |                    |           |          |                    | SKA<br>T | Burden                 |                     | SKAT        | CMC                    | CLP                   | CALPH<br>A | Burden                | SKATO                 | CMC                    | CLP                    | CALPH<br>A            | Burden                 | SKATO                  |
| 5FCx0FNC   | 0.236              | NA        | 0.141    | 0.004              | 0.301    | 0.003                  | <1×10 <sup>-5</sup> | NA          | 5.42×10 <sup>-6</sup>  | 4.66×10 <sup>-6</sup> | NA         | NA                    | NA                    | 3.93×10 <sup>-9</sup>  | 3.06×10 <sup>-9</sup>  | NA                    | NA                     | NA                     |
| 5FCx5FNC   | 0.235              | 0.124     | 0.023    | 0.002              | 0.123    | 7.99×10 <sup>-4</sup>  | <1×10 <sup>-5</sup> | NA          | 0.004                  | 0.005                 | NA         | NA                    | NA                    | 2.10×10 <sup>-5</sup>  | 4.00×10 <sup>-5</sup>  | NA                    | NA                     | NA                     |
| 5FCx10FNC  | 0.354              | 0.338     | 0.112    | 0.005              | 0.079    | 7.99×10 <sup>-4</sup>  | <1×10 <sup>-5</sup> | NA          | 0.032                  | 0.036                 | NA         | NA                    | NA                    | 7.71×10 <sup>-4</sup>  | 1.01×10 <sup>-3</sup>  | NA                    | NA                     | NA                     |
| 5FCx15FNC  | 0.377              | 0.359     | 0.202    | 0.005              | 0.095    | 0.002                  | <1×10 <sup>-5</sup> | NA          | 0.062                  | 0.061                 | NA         | NA                    | NA                    | 0.002                  | 2.84×10 <sup>-3</sup>  | NA                    | NA                     | NA                     |
| 5FCx20FNC  | 0.377              | 0         | 0.201    | 0.006              | 0.114    | 0.003                  | <1×10 <sup>-5</sup> | 0.321       | 0.073                  | 0.075                 | 0.670      | 0.075                 | 0.134                 | 0.002                  | 2.40×10 <sup>-3</sup>  | 0.132                 | 0.002                  | 0.005                  |
| 10FCx15FNC | 0.083              | 0         | 0.028    | 9×10 <sup>-4</sup> | 0.004    | 2.65×10 <sup>-6</sup>  | <1×10 <sup>-5</sup> | 0.047       | 0.005                  | 0.008                 | 0.272      | 0.008                 | 0.017                 | 6.81×10 <sup>-6</sup>  | 1.33×10 <sup>-5</sup>  | 0.013                 | 1.33×10 <sup>-5</sup>  | 3.62×10 <sup>-5</sup>  |
| 15FCx10FNC | 0.014              | 0         | 0.005    | 9×10 <sup>-4</sup> | 0.001    | 1.77×10 <sup>-9</sup>  | <1×10 <sup>-5</sup> | 0.051       | 1.72×10 <sup>-6</sup>  | 6.31×10 <sup>-5</sup> | 0.024      | 6.31×10 <sup>-5</sup> | 1.30×10 <sup>-4</sup> | 4.26×10 <sup>-11</sup> | 3.27×10 <sup>-9</sup>  | 0.001                 | 3.27×10 <sup>-9</sup>  | 8.93×10 <sup>-9</sup>  |
| 20FCx5FNC  | 0.002              | 0         | 0.002    | 9×10 <sup>-4</sup> | 0.002    | 1.30×10 <sup>-9</sup>  | <1×10 <sup>-5</sup> | 0.039       | 1.48×10 <sup>-11</sup> | 7.85×10 <sup>-7</sup> | 0.024      | 7.85×10 <sup>-7</sup> | 1.14×10 <sup>-6</sup> | 6.12×10 <sup>-18</sup> | 2.12×10 <sup>-12</sup> | 6.32×10 <sup>-4</sup> | 2.12×10 <sup>-12</sup> | 2.54×10 <sup>-10</sup> |
| 25FCx0FNC  | 3×10 <sup>-4</sup> | 0         | 0.001    | 9×10 <sup>-4</sup> | 0.001    | 1.42×10 <sup>-10</sup> | <1×10 <sup>-5</sup> | 0.033       | 1.55×10 <sup>-19</sup> | 4.44×10 <sup>-8</sup> | 0.025      | 4.44×10 <sup>-8</sup> | 7.06×10 <sup>-8</sup> | 4.59×10 <sup>-29</sup> | 4.58×10 <sup>-15</sup> | 5.10×10 <sup>-4</sup> | 4.58×10 <sup>-15</sup> | 2.54×10 <sup>-10</sup> |

<sup>1</sup>**Simulated scenarios:** **5FC:** five families carrier of variants within the hypothetical gene; **5FCx5FNC:** five families carrier of variants within the hypothetical gene and five families non-carrier of variants within the hypothetical gene; **5FCx10FNC:** five families carrier of variants within the hypothetical gene and ten families non-carrier of variants within the hypothetical gene; **5FCx15FNC:** five families carrier of variants within the hypothetical gene and fifteen families non-carrier of variants within the hypothetical gene; **5FCx20FNC:** five families carrier of variants within the hypothetical gene and twenty families non-carrier of variants within the hypothetical gene; **10FCx15FNC:** ten families carrier of variants within the hypothetical gene and fifteen families non-carrier of variants within the hypothetical gene; **15FCx10FNC:** fifteen families carrier of variants within the hypothetical gene and ten families non-carrier of variants within the hypothetical gene; **20FCx5FNC:** twenty families carrier of variants within the hypothetical gene and five families non-carrier of variants within the hypothetical gene; **25FC:** twenty-five families carrier of variants within the hypothetical gene.

\*we tested SKAT, CMC and VT on EPACTS, but CMC and VT reported all NA values so data is not shown.

**Table 5.** Gene-based p-values for the *APOE* gene under different gene-set scenarios for the gene-based methods tested in the entire dataset (N=1235, 285 families). In the analysis, only nonsynonymous variants (only SNVs) with a MAF<0.01, and the APOE  $\epsilon 2$  and  $\epsilon 4$ , were considered and we adjusted by sex and PCAs. Highlighted in bold, significant p-values after multiple test correction.

| <i>APOE</i>                                 | N  | GSKAT        | FSKAT        | SKAT         | RVGDT        | PedGene      |        | Rare IBD     | EPACTS* | FarVAT                                   |              |                                         |              |              | FarVAT-BLUP                              |              |                                         |              |                                         |
|---------------------------------------------|----|--------------|--------------|--------------|--------------|--------------|--------|--------------|---------|------------------------------------------|--------------|-----------------------------------------|--------------|--------------|------------------------------------------|--------------|-----------------------------------------|--------------|-----------------------------------------|
|                                             |    |              |              |              |              | SKAT         | Burden |              | SKAT    | CMC                                      | CLP          | CALPHA                                  | Burden       | SKATO        | CMC                                      | CLP          | CALPHA                                  | Burden       | SKATO                                   |
| <b>gene</b>                                 | 19 | 0.035        | 0.037        | 0.061        | 0.164        | <b>0.008</b> | 0.515  | 0.712        | 0.205   | 0.053                                    | 0.379        | <b>0.003</b>                            | 0.379        | <b>0.005</b> | 0.036                                    | 0.311        | 0.017                                   | 0.311        | 0.034                                   |
| <b>HM-<math>\epsilon 2\epsilon 4</math></b> | 4  | <b>0.003</b> | <b>0.002</b> | <b>0.001</b> | <b>0.005</b> | 0.412        | 0.414  | 0.359        | 0.020   | <b><math>7.87 \times 10^{-15}</math></b> | 0.420        | <b><math>4.99 \times 10^{-4}</math></b> | 0.420        | <b>0.001</b> | <b><math>3.73 \times 10^{-14}</math></b> | 0.275        | <b><math>3.99 \times 10^{-4}</math></b> | 0.275        | <b><math>6.99 \times 10^{-4}</math></b> |
| <b>HM</b>                                   | 2  | 0.067        | 0.089        | 0.048        | 0.237        | 0.177        | 0.177  | 0.741        | 0.022   | 0.028                                    | 0.052        | 0.014                                   | 0.052        | 0.018        | 0.053                                    | 0.090        | 0.024                                   | 0.090        | 0.031                                   |
| <b><math>\epsilon 2\epsilon 4</math></b>    | 2  | <b>0.005</b> | <b>0.002</b> | <b>0.003</b> | <b>0.004</b> | 0.849        | 0.855  | <b>0.002</b> | 0.024   | <b><math>7.87 \times 10^{-15}</math></b> | <b>0.002</b> | <b>0.002</b>                            | <b>0.002</b> | <b>0.003</b> | <b><math>3.73 \times 10^{-14}</math></b> | <b>0.002</b> | <b>0.001</b>                            | <b>0.001</b> | <b>0.001</b>                            |

**gene**: set of 19 polymorphic variants within *APOE* gene, including *APOE*  $\epsilon 2$  and  $\epsilon 4$  variants; **HM- $\epsilon 2\epsilon 4$** : set of variants considered HIGH or MODERATE including *APOE*  $\epsilon 2$  and  $\epsilon 4$  variants; **HM**: set of variants considered HIGH or MODERATE without *APOE*  $\epsilon 2$  and  $\epsilon 4$  variants;  **$\epsilon 2\epsilon 4$** : *APOE*  $\epsilon 2$  and  $\epsilon 4$  variants alone. N: number of variants that went into analysis.

\*we tested SKAT, CMC and VT on EPACTS, but CMC and VT reported all NA values so data is not shown.

**Table 6.** Top results for all gene-based methods tested. Top gene, p-value and lambda for each test is given, ordered by lambda value.

| <b>Software</b>         | <b>TEST</b> | <b>Top gene</b>         | <b>Top p-value</b>     | <b>Lambda</b> |
|-------------------------|-------------|-------------------------|------------------------|---------------|
| <b>PedGene</b>          | SKAT        | <i>KANSL1L</i>          | $2.42 \times 10^{-12}$ | 3.533         |
| <b>PedGene</b>          | Burden      | <i>TTN</i>              | $1.04 \times 10^{-8}$  | 2.997         |
| <b>GSKAT</b>            | Burden      | <i>PCSK6</i>            | $3.04 \times 10^{-3}$  | 1.704         |
| <b>GSKAT</b>            | SKAT        | <i>NR1D1</i>            | $1.90 \times 10^{-3}$  | 1.681         |
| <b>Rare-IBD</b>         | TDT         | <i>SNTB2</i>            | $1.00 \times 10^{-4}$  | 1.450         |
| <b>FarVAT-<br/>BLUP</b> | CALPHA      | <i>CHRD</i>             | $4.60 \times 10^{-07}$ | 1.259         |
| <b>FarVAT</b>           | CALPHA      | <i>CHRD</i>             | $2.09 \times 10^{-07}$ | 1.152         |
| <b>FarVAT-<br/>BLUP</b> | CLP         | <i>NLRP9</i>            | $1.14 \times 10^{-4}$  | 1.112         |
| <b>FarVAT-<br/>BLUP</b> | SKATO       | <i>CHRD</i>             | $7.37 \times 10^{-7}$  | 1.101         |
| <b>FarVAT-<br/>BLUP</b> | CMC         | <i>IGHV1-69</i>         | $1.28 \times 10^{-4}$  | 1.066         |
| <b>FarVAT-<br/>BLUP</b> | Burden      | <i>NLRP9</i>            | $1.14 \times 10^{-4}$  | 1.031         |
| <b>FarVAT</b>           | SKATO       | <i>CHRD</i>             | $3.54 \times 10^{-7}$  | 1.016         |
| <b>FarVAT</b>           | CLP         | <i>MASIL</i>            | $1.25 \times 10^{-5}$  | 1.000         |
| <b>RVGDT</b>            | TDT         | <i>RTN3</i>             | $9.99 \times 10^{-4}$  | 0.995         |
| <b>FarVAT</b>           | CMC         | <i>HSD3B1</i>           | $4.40 \times 10^{-5}$  | 0.993         |
| <b>FarVAT</b>           | Burden      | <i>MASIL</i>            | $1.25 \times 10^{-5}$  | 0.985         |
| <b>EPACTS</b>           | VT          | <i>PPAN-<br/>P2RY11</i> | $1.20 \times 10^{-4}$  | 0.954         |
| <b>FSKAT</b>            | SKAT        | <i>CHRD</i>             | $2.00 \times 10^{-5}$  | 0.938         |
| <b>EPACTS</b>           | CMC         | <i>BTN2A2</i>           | $1.05 \times 10^{-3}$  | 0.849         |
| <b>SKAT</b>             | IBS         | <i>CHRD</i>             | $7.94 \times 10^{-5}$  | 0.668         |
| <b>EPACTS</b>           | SKAT        | <i>CHRD</i>             | $2.42 \times 10^{-5}$  | 0.635         |
| <b>SKAT</b>             | PED         | <i>CHRD</i>             | $2.47 \times 10^{-4}$  | 0.360         |
| <b>SKAT</b>             | HR          | <i>NR1D1</i>            | $2.06 \times 10^{-2}$  | 0.039         |
| <b>SKAT</b>             | BN          | <i>NR1D1</i>            | $2.21 \times 10^{-2}$  | 0.038         |

**Table 7.** Most frequent genes, within p-value threshold category, across the different gene-based family-based methods tested. Highlighted in bold the tests with significant p-value according to threshold category.

| P-value threshold       | gene          | # | EPACTS |       |                              | FSKAT                        | GSKAT |        | RVGD                         | SKAT                         |                              | FarVAT                       |                              |                              |                              |                              | FarVAT-BLUP                  |                              |                              |                              |                              | Rare-IBD |
|-------------------------|---------------|---|--------|-------|------------------------------|------------------------------|-------|--------|------------------------------|------------------------------|------------------------------|------------------------------|------------------------------|------------------------------|------------------------------|------------------------------|------------------------------|------------------------------|------------------------------|------------------------------|------------------------------|----------|
|                         |               |   | CMC    | VT    | SKAT                         |                              | SKAT  | Burden |                              | IBS                          | CMC                          | CLP                          | Burden                       | CALPHA                       | SKATO                        | CMC                          | CLP                          | Burden                       | CALPHA                       | SKATO                        |                              |          |
| $\leq 5 \times 10^{-7}$ | <i>CHRD</i>   | 3 | 0.007  | 0.031 | <b>2.42</b> $\times 10^{-5}$ | <b>1.50</b> $\times 10^{-5}$ | 0.013 | 0.013  | 0.990                        | <b>7.94</b> $\times 10^{-5}$ | 0.007                        | 0.007                        | 0.007                        | <b>2.09</b> $\times 10^{-7}$ | <b>3.54</b> $\times 10^{-7}$ | 0.004                        | 0.004                        | 0.004                        | <b>4.06</b> $\times 10^{-7}$ | <b>7.37</b> $\times 10^{-7}$ | 0.071                        |          |
| $\leq 5 \times 10^{-6}$ | <i>CHRD</i>   | 4 | 0.007  | 0.031 | 0.000                        | 0.000                        | 0.013 | 0.013  | 0.990                        | 0.000                        | 0.007                        | 0.007                        | 0.007                        | <b>2.09</b> $\times 10^{-7}$ | <b>3.54</b> $\times 10^{-7}$ | 0.004                        | 0.004                        | 0.004                        | <b>4.06</b> $\times 10^{-7}$ | <b>7.37</b> $\times 10^{-7}$ | 0.071                        |          |
| $\leq 5 \times 10^{-5}$ | <i>CHRD</i>   | 5 | 0.007  | 0.031 | <b>2.42</b> $\times 10^{-5}$ | <b>1.50</b> $\times 10^{-5}$ | 0.013 | 0.013  | 0.990                        | 0.000                        | 0.007                        | 0.007                        | 0.007                        | <b>2.09</b> $\times 10^{-7}$ | <b>3.54</b> $\times 10^{-7}$ | 0.004                        | 0.004                        | 0.004                        | <b>4.06</b> $\times 10^{-7}$ | <b>7.37</b> $\times 10^{-7}$ | 0.071                        |          |
|                         | <i>CLCN2</i>  | 4 | 0.018  | 0.043 | <b>2.33</b> $\times 10^{-4}$ | <b>2.07</b> $\times 10^{-4}$ | 0.020 | 0.020  | 1.000                        | <b>7.30</b> $\times 10^{-4}$ | 0.006                        | 0.005                        | 0.005                        | <b>6.46</b> $\times 10^{-6}$ | <b>1.12</b> $\times 10^{-5}$ | 0.011                        | 0.009                        | 0.009                        | <b>6.51</b> $\times 10^{-6}$ | <b>1.32</b> $\times 10^{-5}$ | 0.299                        |          |
|                         | <i>MASIL</i>  | 3 | 0.002  | 0.003 | 0.057                        | 0.019                        | 0.187 | 0.187  | 0.998                        | 0.042                        | <b>4.65</b> $\times 10^{-4}$ | <b>1.25</b> $\times 10^{-5}$ | <b>1.25</b> $\times 10^{-5}$ | <b>4.27</b> $\times 10^{-4}$ | <b>1.96</b> $\times 10^{-5}$ | 0.001                        | <b>1.32</b> $\times 10^{-4}$ | <b>1.32</b> $\times 10^{-4}$ | 0.015                        | <b>2.73</b> $\times 10^{-4}$ | 0.685                        |          |
|                         | <i>PTK2B</i>  | 3 | 0.001  | 0.009 | 0.331                        | 0.205                        | 0.090 | 0.090  | 1.000                        | 0.193                        | <b>1.23</b> $\times 10^{-4}$ | <b>1.31</b> $\times 10^{-5}$ | <b>1.31</b> $\times 10^{-5}$ | 0.060                        | <b>2.46</b> $\times 10^{-5}$ | 0.001                        | <b>2.39</b> $\times 10^{-4}$ | <b>2.39</b> $\times 10^{-4}$ | 0.113                        | <b>4.93</b> $\times 10^{-4}$ | 0.443                        |          |
| $\leq 5 \times 10^{-4}$ | <i>CPAMD8</i> | 8 | 0.002  | 0.003 | 0.652                        | 0.178                        | 0.155 | 0.191  | <b>9.99</b> $\times 10^{-4}$ | 0.572                        | <b>6.91</b> $\times 10^{-5}$ | <b>2.02</b> $\times 10^{-4}$ | <b>2.02</b> $\times 10^{-4}$ | 0.309                        | <b>4.22</b> $\times 10^{-4}$ | <b>1.69</b> $\times 10^{-4}$ | <b>2.03</b> $\times 10^{-4}$ | <b>2.03</b> $\times 10^{-4}$ | 0.268                        | <b>4.23</b> $\times 10^{-4}$ | <b>6.00</b> $\times 10^{-4}$ |          |
|                         | <i>NLRP9</i>  | 8 | 0.001  | 0.003 | 0.020                        | 0.013                        | 0.029 | 0.029  | 0.998                        | 0.019                        | <b>2.81</b> $\times 10^{-4}$ | <b>2.40</b> $\times 10^{-4}$ | <b>2.40</b> $\times 10^{-4}$ | 0.002                        | <b>3.78</b> $\times 10^{-4}$ | <b>4.50</b> $\times 10^{-4}$ | <b>1.14</b> $\times 10^{-4}$ | <b>1.14</b> $\times 10^{-4}$ | 0.003                        | <b>2.59</b> $\times 10^{-4}$ | 0.157                        |          |
|                         | <i>MASIL</i>  | 8 | 0.002  | 0.003 | 0.057                        | 0.019                        | 0.187 | 0.187  | 0.998                        | 0.042                        | <b>4.65</b> $\times 10^{-4}$ | <b>1.25</b> $\times 10^{-5}$ | <b>1.25</b> $\times 10^{-5}$ | <b>4.27</b> $\times 10^{-4}$ | <b>1.96</b> $\times 10^{-5}$ | 0.001                        | <b>1.32</b> $\times 10^{-4}$ | <b>1.32</b> $\times 10^{-4}$ | 0.015                        | <b>2.73</b> $\times 10^{-4}$ | 0.685                        |          |
|                         | <i>CHRD</i>   | 7 | 0.007  | 0.031 | <b>2.42</b> $\times 10^{-5}$ | <b>1.50</b> $\times 10^{-5}$ | 0.013 | 0.013  | 0.990                        | <b>7.94</b> $\times 10^{-5}$ | 0.007                        | 0.007                        | 0.007                        | <b>2.09</b> $\times 10^{-7}$ | <b>3.54</b> $\times 10^{-7}$ | 0.004                        | 0.004                        | 0.004                        | <b>4.60</b> $\times 10^{-7}$ | <b>7.37</b> $\times 10^{-7}$ | 0.071                        |          |
|                         | <i>PTK2B</i>  | 7 | 0.001  | 0.009 | 0.331                        | 0.205                        | 0.090 | 0.090  | 1.000                        | 0.193                        | <b>1.23</b> $\times 10^{-4}$ | <b>1.31</b> $\times 10^{-5}$ | <b>1.31</b> $\times 10^{-5}$ | 0.060                        | <b>2.46</b> $\times 10^{-5}$ | 0.001                        | <b>2.39</b> $\times 10^{-4}$ | <b>2.39</b> $\times 10^{-4}$ | 0.113                        | <b>4.93</b> $\times 10^{-4}$ | 0.443                        |          |
|                         | <i>CLCN2</i>  | 6 | 0.018  | 0.043 | <b>2.33</b> $\times 10^{-4}$ | <b>2.07</b> $\times 10^{-4}$ | 0.020 | 0.020  | 1.000                        | <b>7.30</b> $\times 10^{-4}$ | 0.006                        | 0.005                        | 0.005                        | <b>6.46</b> $\times 10^{-6}$ | <b>1.12</b> $\times 10^{-5}$ | 0.011                        | 0.009                        | 0.009                        | <b>6.51</b> $\times 10^{-6}$ | <b>1.32</b> $\times 10^{-5}$ | 0.299                        |          |
|                         | <i>HDLBP</i>  | 5 | 0.002  | 0.004 | 0.009                        | 0.001                        | 0.032 | 0.032  | 0.996                        | 0.002                        | 0.021                        | 0.028                        | 0.028                        | 0.068                        | 0.046                        | <b>1.79</b> $\times 10^{-4}$ | <b>4.92</b> $\times 10^{-4}$ | <b>4.92</b> $\times 10^{-4}$ | <b>2.89</b> $\times 10^{-4}$ | <b>1.22</b> $\times 10^{-4}$ | 0.428                        |          |

\*PedGene results have not been included given the inflated results of this test and the low correlation with the other gene-based methods.



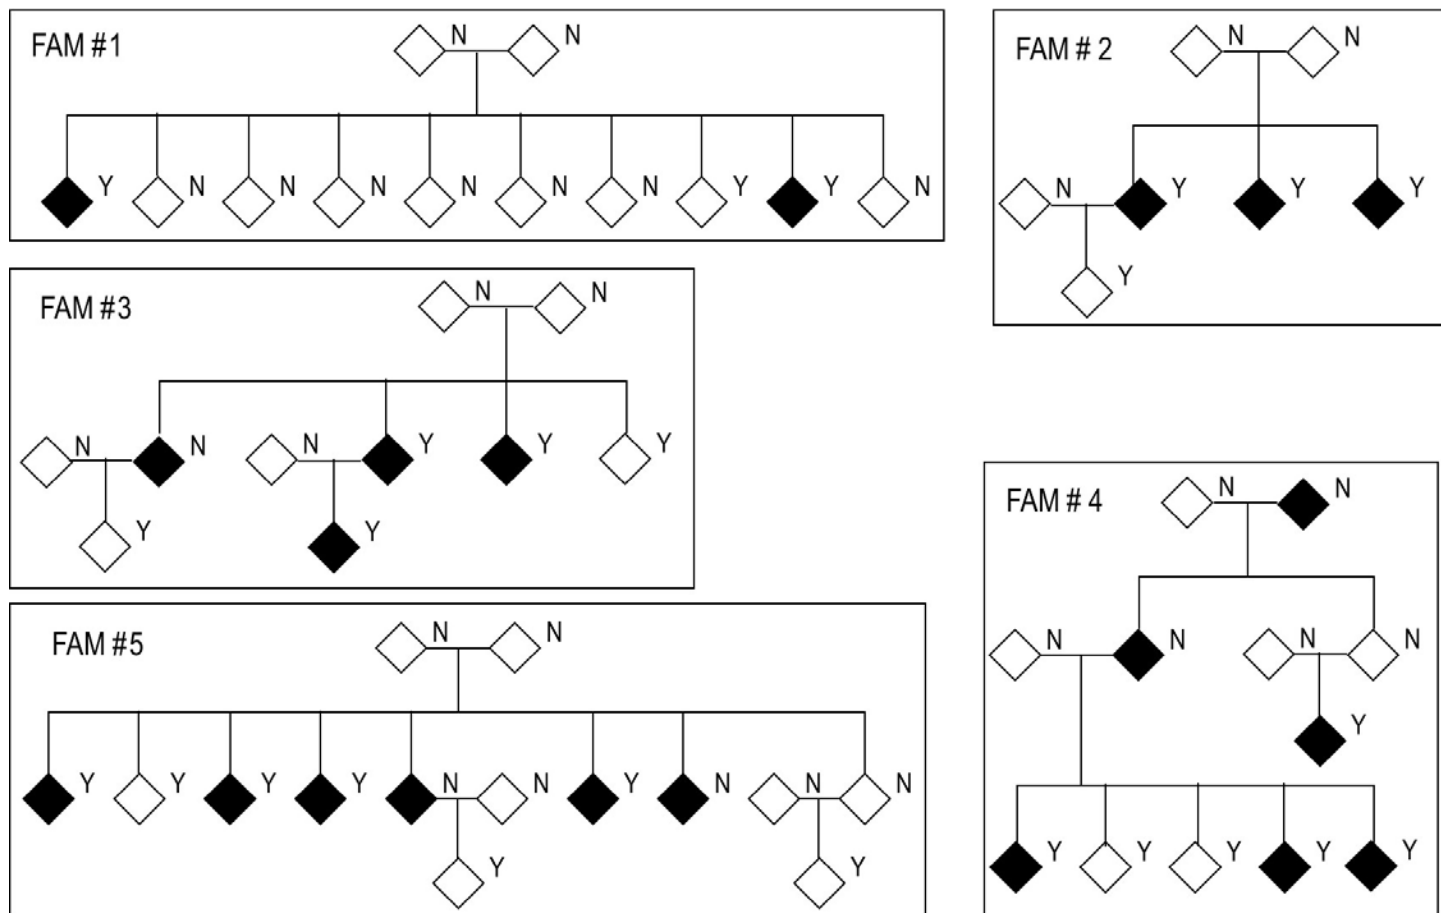

**Figure 1.** Structure of families used in this study. Black diamonds represent cases and white diamonds represent controls. Y: genetic data available. N: no genetic data available.

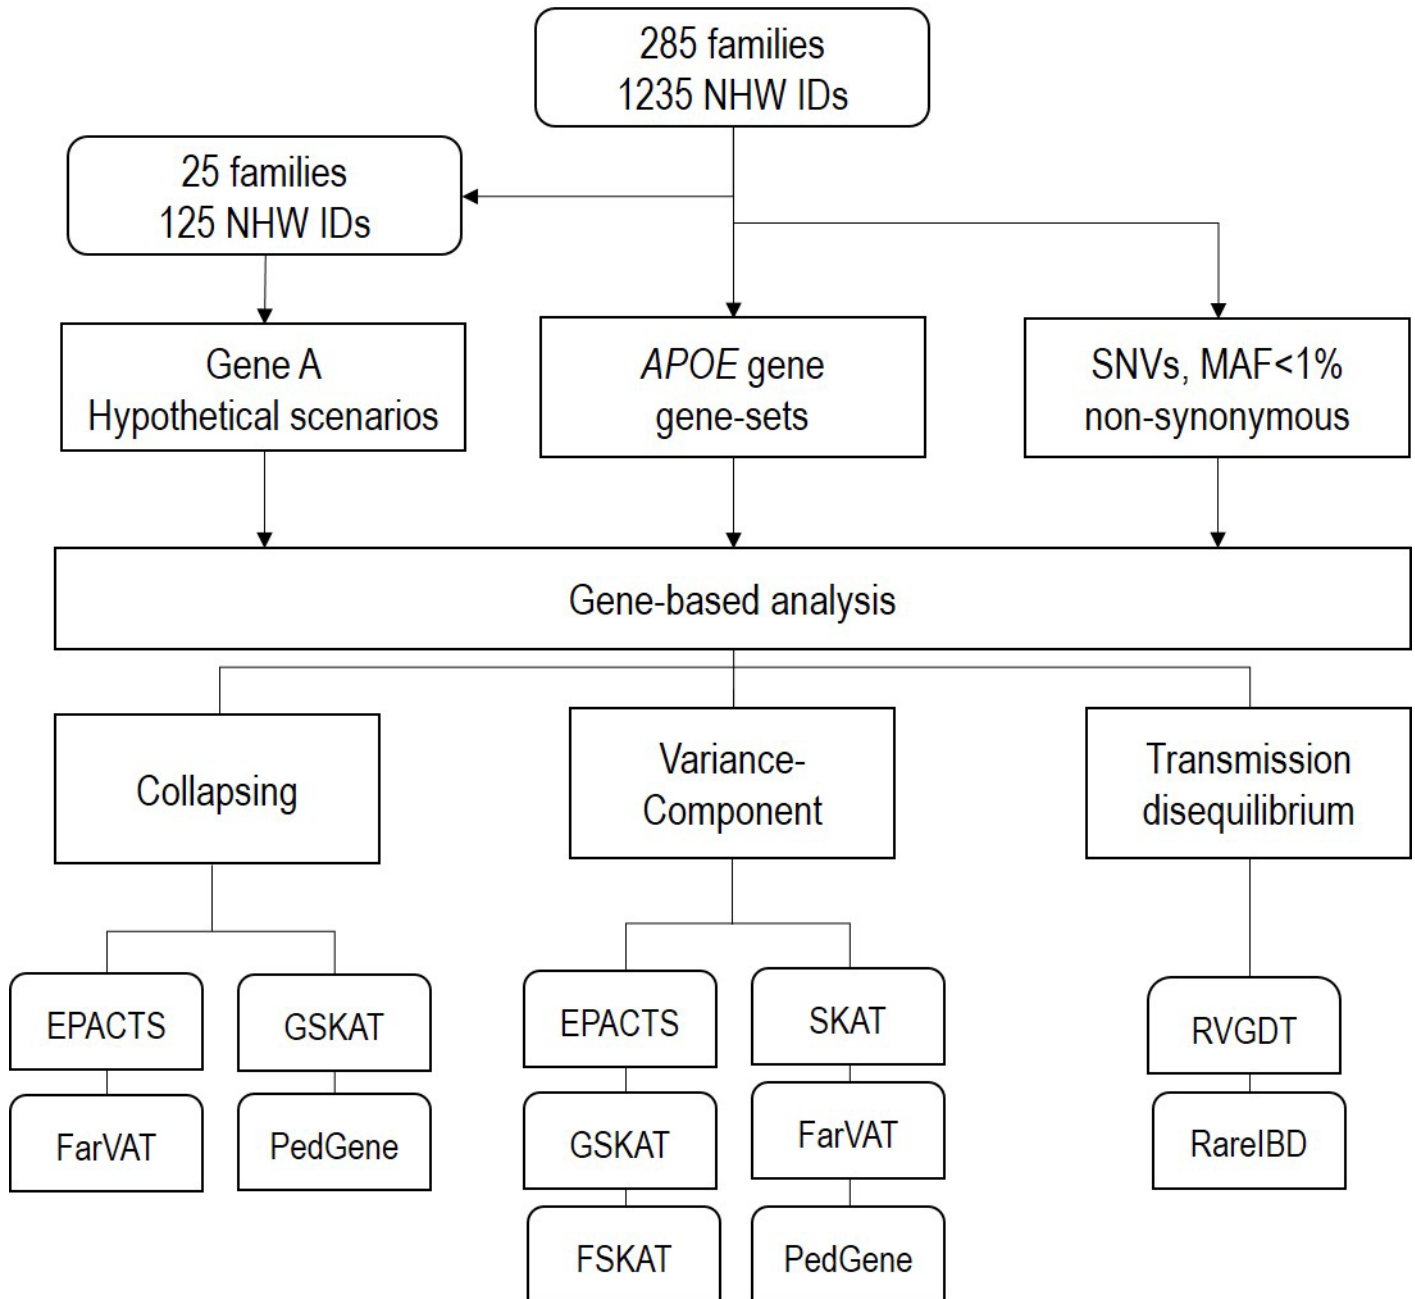

**Figure2.** Schematic design of the analysis performed in this study.

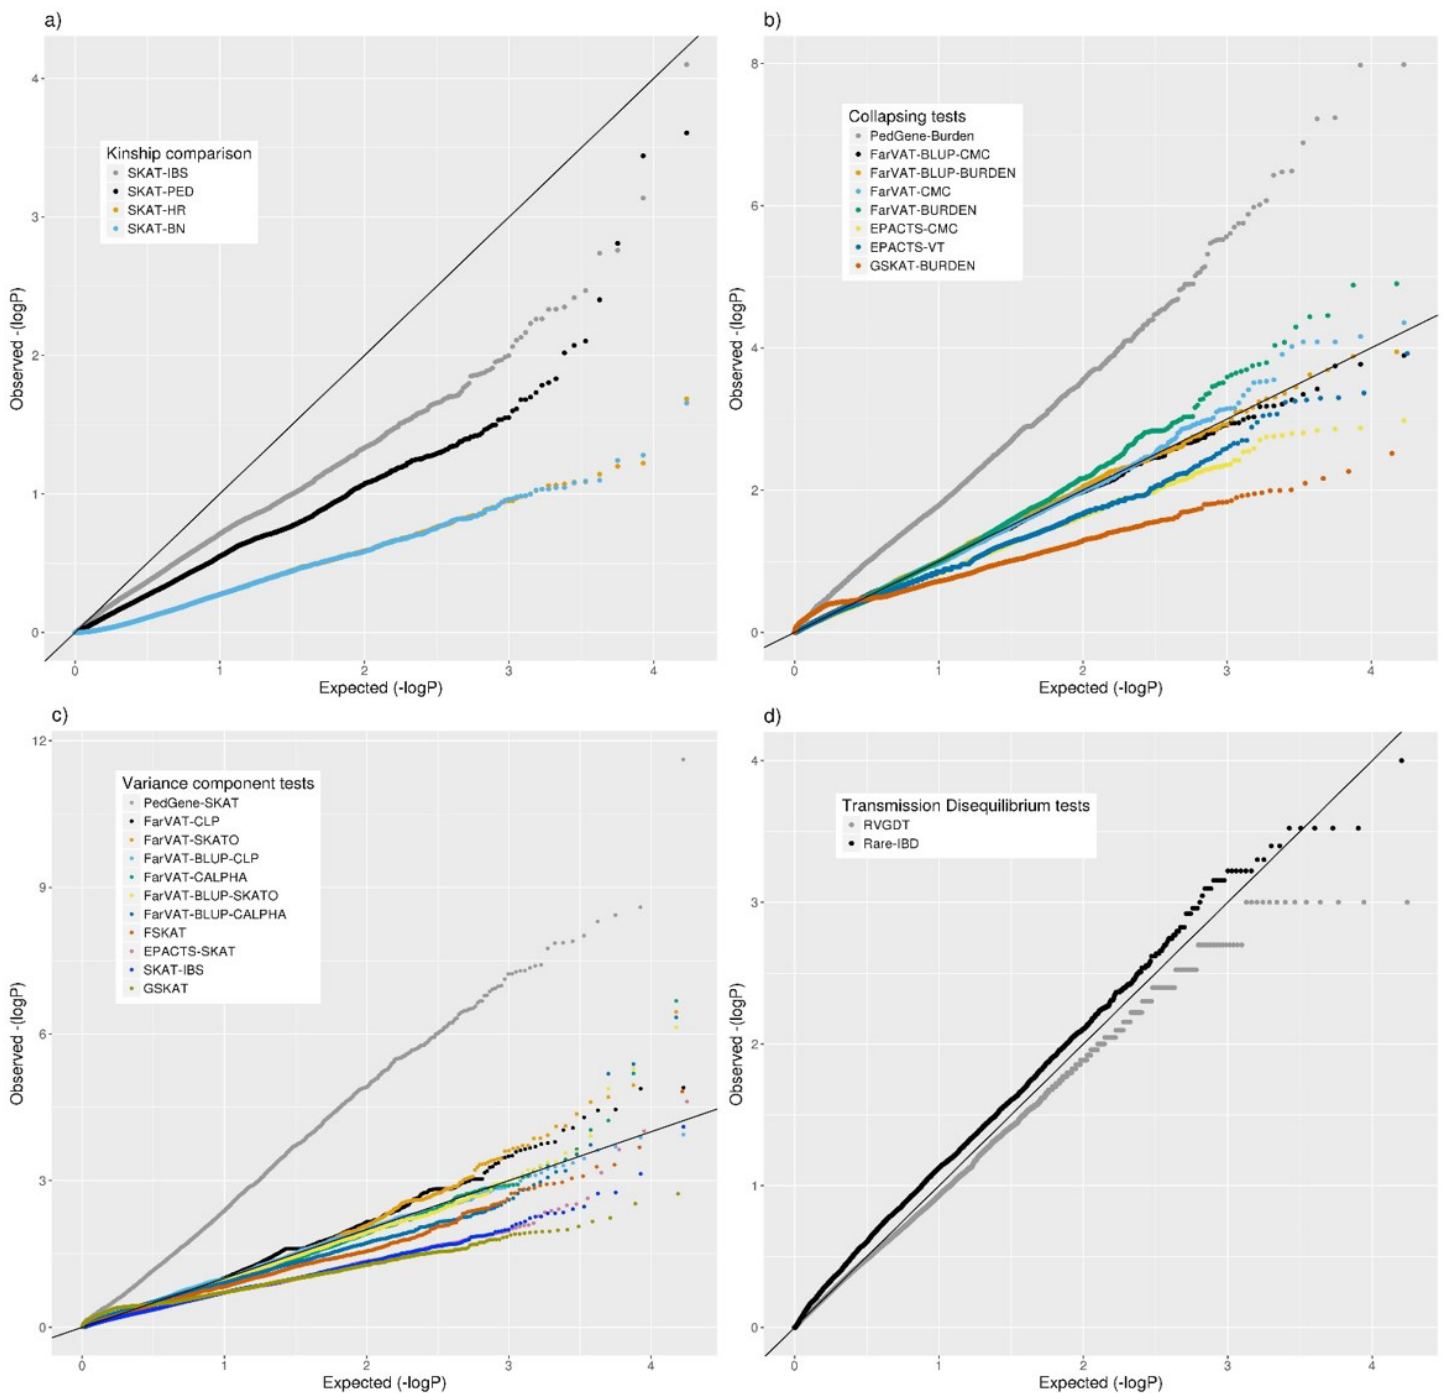

**Figure 3.** Quantile-quantile (QQ) plots from different family-based gene-based methods for all nonsynonymous variants with a MAF <1% in our family-based dataset. a) Comparison of SKAT test using different kinship matrices: pedigree calculation (PED), Identity By Similarity (IBS) estimation, Balding-Nichols (BN) estimation, and the kinship generated by EPACTS (HR). c) Comparison of different collapsing tests: GSKAT, EPACTS, FarVAT and PedGene. b) Comparison of different variance-component gene-based methods: GSKAT, FSKAT, SKAT, EPACTS, FarVAT and PedGene. d) Comparison of transmission disequilibrium tests: RVGDT and RareIBD.

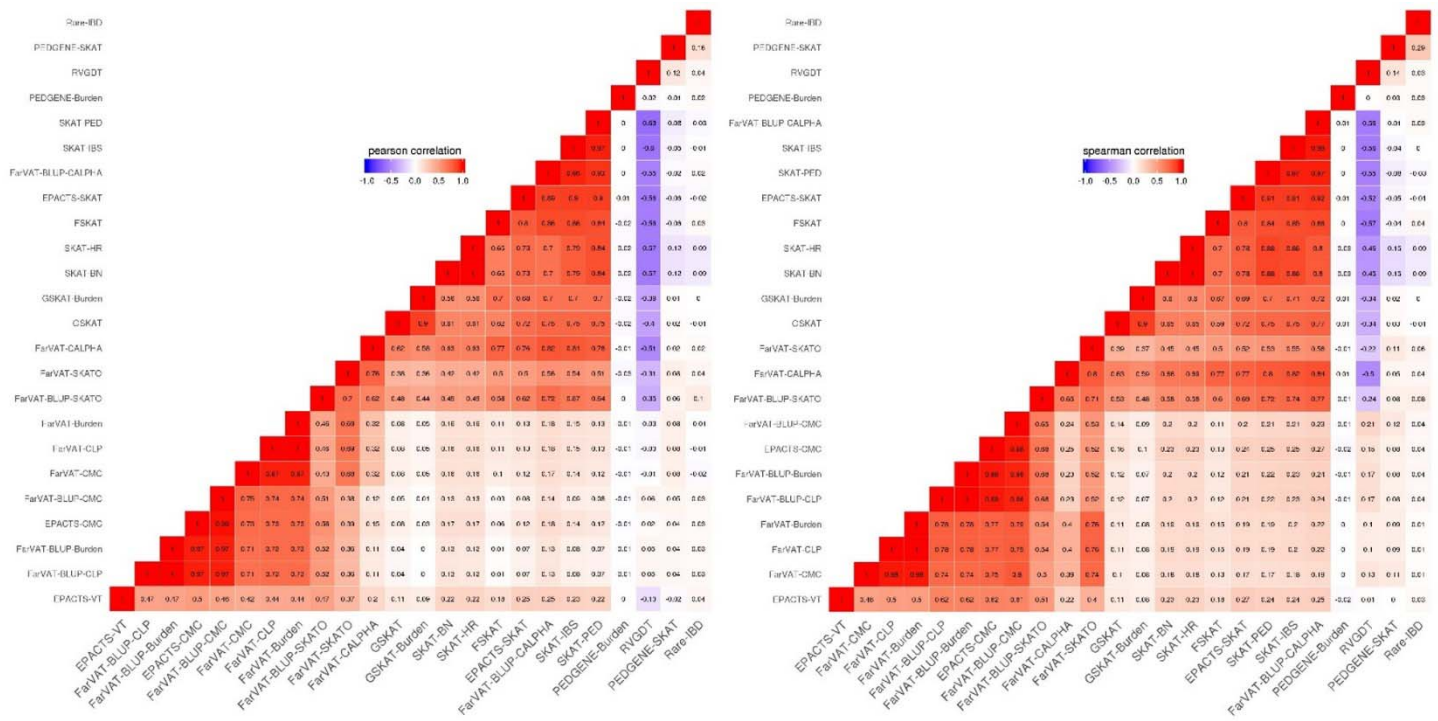

**Figure 4.** Correlation plots from different family-based gene-based methods for genes with a p-value  $\leq 0.005$ . a) Pearson correlation correlates genes according to their p-values. b) Spearman correlation correlates genes according to their rankings.

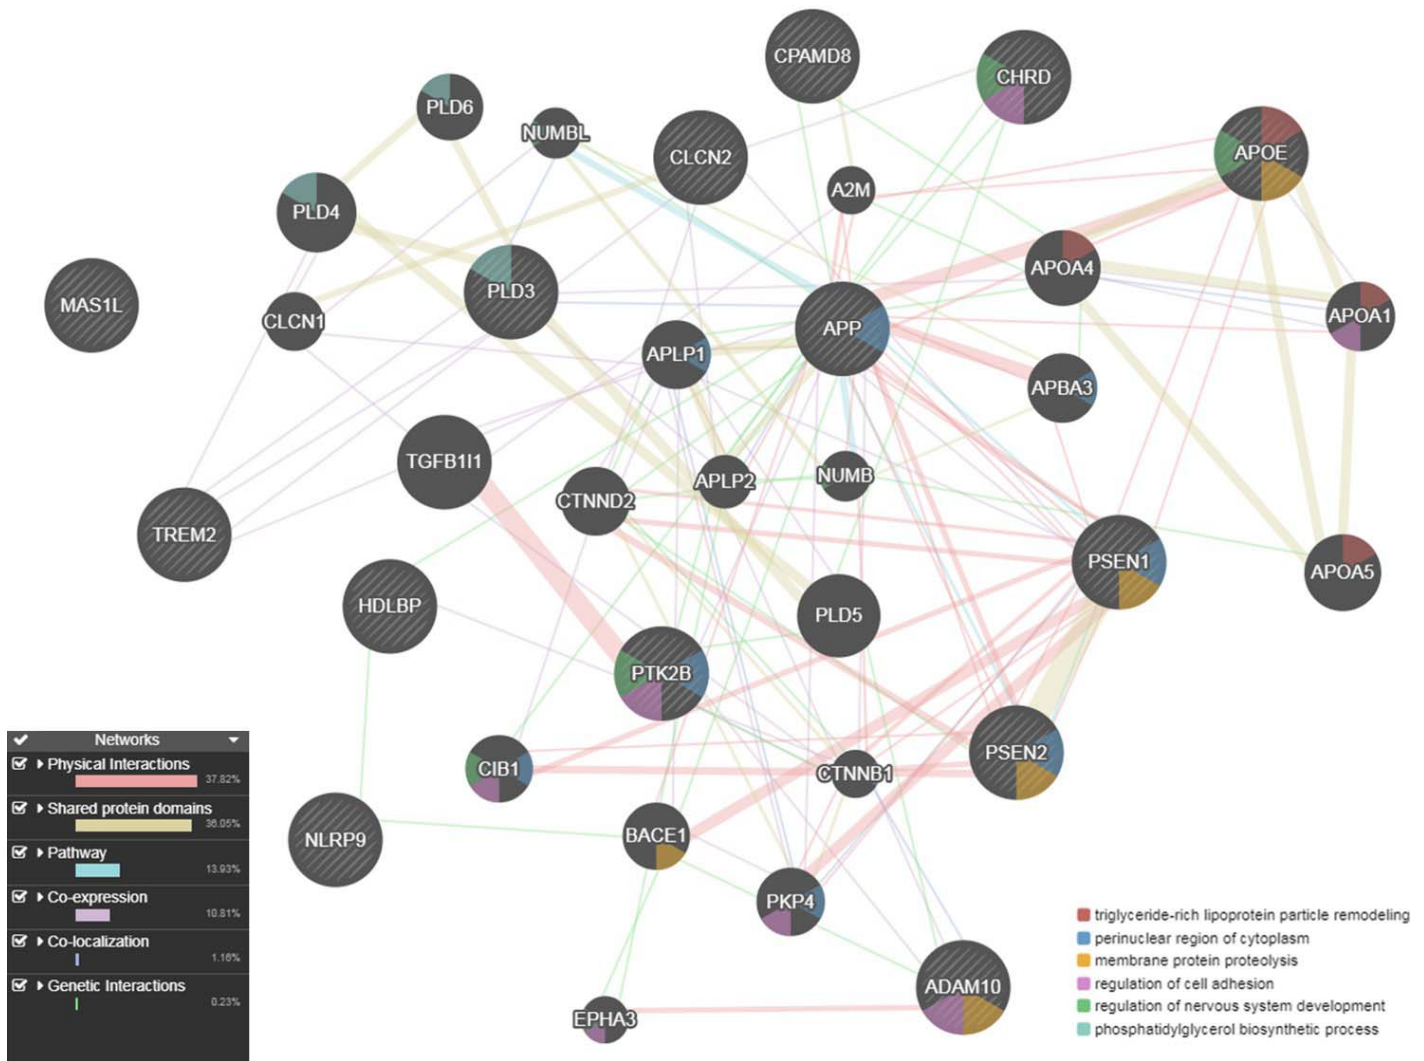

**Figure 5.** Gene network for the seven candidate genes (*CHRD*, *CLCN2*, *CPAMD8*, *HDLBP*, *MAS1L*, *NLRP9* and *PTK2B*) with multiple evidence of a  $p$ -value  $\leq 5 \times 10^{-04}$ , anchored with known AD genes (*APP*, *PSEN1*, *PSEN2*, *APOE*, *TREM2*, *ADAM10*, *PLD3*), as described by GeneMania.
